# Supplementary material
Source: MDPI journal article supplement (https://www.mdpi.com/2073-4344/11/2/286)
Supplement: s1 [file s1]

Enzyme Name,UniprotID,ECNumber,Organism,PDB ID,Chain ID,Mutated Site,Reaction,Reaction Substrate ,SMILES of Substrate,Product,Temperature(��C),pH,Catalytic Efficicnecy Change,PubMedID
haloalkane dehalogenase,D4Z2G1,3.8.1.5,Sphingomonas paucimobilis,1MJ5,A,mutant L177A,"H2O + 1,2-Dibromoethane = Br- + 2-Bromoethanol","1,2-Dibromoethane",C(CBr)Br,Br-;2-Bromoethanol,37,8.6,0.01872383,14525993
"glucan 1,4-alpha-glucosidase",G8JZS4,3.2.1.3,Bacteroides thetaiotaomicron,2D73,A,mutant E194A,H2O + p-Nitrophenyl-alpha-D-glucoside = beta-D-Glucose + p-Nitrophenol,p-Nitrophenyl-alpha-D-glucoside,C1=CC(=CC=C1[N+](=O)[O-])OC2C(C(C(C(O2)CO)O)O)O,beta-D-Glucose;p-Nitrophenol,37,6.6,-4.234593545,18848471
"glucan 1,4-alpha-glucosidase",G8JZS4,3.2.1.3,Bacteroides thetaiotaomicron,2D73,A,mutant E532A,H2O + p-Nitrophenyl-alpha-D-glucoside = beta-D-Glucose + p-Nitrophenol,p-Nitrophenyl-alpha-D-glucoside,C1=CC(=CC=C1[N+](=O)[O-])OC2C(C(C(C(O2)CO)O)O)O,p-Nitrophenol;beta-D-Glucose,37,6.6,-4.373972882,18848471
fructose-bisphosphatase,O00757,3.1.3.11,Homo sapiens,3IFA,A,mutant K20E,"H2O + D-Fructose 1,6-bisphosphate = Phosphate + D-Fructose 6-phosphate","D-Fructose 1,6-bisphosphate",,D-Fructose 6-phosphate;Phosphate,37,7.5,-0.482952603,16213487
phosphonoacetaldehyde hydrolase,O31156,3.11.1.1,Bacillus cereus,1SWW,A,mutant C22A,H2O + 2-Phosphonoacetaldehyde = Acetaldehyde + Phosphate,Phosphonoacetaldehyde,[H]C(=O)CP(O)(O)=O,Acetaldehyde;Phosphate,25,7.5,-4.816590352,14670958
phosphonoacetaldehyde hydrolase,O31156,3.11.1.1,Bacillus cereus,1SWW,A,mutant H56A,H2O + 2-Phosphonoacetaldehyde = Acetaldehyde + Phosphate,Phosphonoacetaldehyde,[H]C(=O)CP(O)(O)=O,Acetaldehyde;Phosphate,25,7.5,-6.778544282,14670958
phosphonoacetaldehyde hydrolase,O31156,3.11.1.1,Bacillus cereus,1SWW,A,mutant Y128F,H2O + 2-Phosphonoacetaldehyde = Acetaldehyde + Phosphate,Phosphonoacetaldehyde,[H]C(=O)CP(O)(O)=O,Acetaldehyde;Phosphate,25,7.5,-2.225212617,14670958
phosphonoacetaldehyde hydrolase,O31156,3.11.1.1,Bacillus cereus,1SWW,A,mutant M49L,H2O + 2-Phosphonoacetaldehyde = Acetaldehyde + Phosphate,Phosphonoacetaldehyde,[H]C(=O)CP(O)(O)=O,Acetaldehyde;Phosphate,25,7.5,-9.646058524,14670958
phosphonoacetaldehyde hydrolase,O31156,3.11.1.1,Bacillus cereus,1SWW,A,mutant G50A,H2O + 2-Phosphonoacetaldehyde = Acetaldehyde + Phosphate,2-Phosphonoacetaldehyde,[H]C(=O)CP(O)(O)=O,Acetaldehyde;Phosphate,25,7.5,-9.360930732,15005616
phosphonoacetaldehyde hydrolase,O31156,3.11.1.1,Bacillus cereus,1SWW,A,mutant H56Q,H2O + 2-Phosphonoacetaldehyde = Acetaldehyde + Phosphate,2-Phosphonoacetaldehyde,[H]C(=O)CP(O)(O)=O,Phosphate;Acetaldehyde,25,7.5,-5.397979793,15005616
citrate synthase (unknown stereospecificity),O34002,2.3.3.16,Arthrobacter sp.,1A59,A,mutant A361R,Coenzyme A + Citrate = Acetyl-CoA + Oxaloacetate + H2O,Acetyl-CoA,,Coenzyme A;Citrate,23,8,1.47840965,11707611
citrate synthase (unknown stereospecificity),O34002,2.3.3.16,Arthrobacter sp.,1A59,A,mutant A10E,Coenzyme A + Citrate = Acetyl-CoA + Oxaloacetate + H2O,Acetyl-CoA,,Coenzyme A;Citrate,23,8,-2.769010952,11707611
2-methylcitrate synthase,O34002,2.3.3.5,Arthrobacter sp.,1A59,A,mutant A361R,Coenzyme A + 2-Methylcitrate = H2O + Propanoyl-CoA + Oxaloacetate,Propanoyl-CoA,,Coenzyme A;2-Methylcitrate,23,8,1.098612289,11707611
citrate synthase (unknown stereospecificity),O34002,2.3.3.16,Arthrobacter sp.,1A59,A,mutant A10E,Coenzyme A + Citrate = Acetyl-CoA + Oxaloacetate + H2O,Oxaloacetate,OC(=O)CC(=O)C(O)=O,Coenzyme A;Citrate,23,8,-1.077993001,11707611
citrate synthase (unknown stereospecificity),O34002,2.3.3.16,Arthrobacter sp.,1A59,A,mutant A361R,Coenzyme A + Citrate = Acetyl-CoA + Oxaloacetate + H2O,Oxaloacetate,OC(=O)CC(=O)C(O)=O,Coenzyme A;Citrate,23,8,-0.944461609,11707611
"3',5'-cyclic-GMP phosphodiesterase",O76083,3.1.4.35,Homo sapiens,3DYN,A,mutant Q453E,"H2O + 3',5'-Cyclic AMP = AMP","3',5'-Cyclic AMP",,AMP,22,8.2,-1.501125119,21483814
"3',5'-cyclic-GMP phosphodiesterase",O76083,3.1.4.35,Homo sapiens,3DYN,A,mutant E406A,"H2O + 3',5'-Cyclic AMP = AMP","3',5'-Cyclic AMP",,AMP,22,8.2,-1.640512489,21483814
alkaline phosphatase,P00634,3.1.3.1,Escherichia coli,3TG0,A,mutant D369N,H2O + 4-Nitrophenyl phosphate = Phosphate + p-Nitrophenol,4-Nitrophenyl phosphate,,p-Nitrophenol;Phosphate,25,8,-5.362037218,11099386
alkaline phosphatase,P00634,3.1.3.1,Escherichia coli,3TG0,A,mutant D434E,H2O + 4-Nitrophenyl phosphate = Phosphate + p-Nitrophenol,4-Nitrophenyl phosphate,,Phosphate;p-Nitrophenol,25,8,-1.604508815,11099386
alkaline phosphatase,P00634,3.1.3.1,Escherichia coli,3TG0,A,mutant E322K,H2O + 4-Nitrophenyl phosphate = Phosphate + p-Nitrophenol,4-Nitrophenyl phosphate,,p-Nitrophenol;Phosphate,25,8,-8.783273808,11099386
alkaline phosphatase,P00634,3.1.3.1,Escherichia coli,3TG0,A,mutant E341K,H2O + 4-Nitrophenyl phosphate = Phosphate + p-Nitrophenol,4-Nitrophenyl phosphate,,p-Nitrophenol;Phosphate,25,8,-6.973907156,11099386
alkaline phosphatase,P00634,3.1.3.1,Escherichia coli,3TG0,A,mutant H412Y,H2O + 4-Nitrophenyl phosphate = Phosphate + p-Nitrophenol,4-Nitrophenyl phosphate,,p-Nitrophenol;Phosphate,25,8,-6.243466809,11099386
alkaline phosphatase,P00634,3.1.3.1,Escherichia coli,3TG0,A,mutant S105L,H2O + 4-Nitrophenyl phosphate = Phosphate + p-Nitrophenol,4-Nitrophenyl phosphate,,Phosphate;p-Nitrophenol,25,8,-1.470291682,11099386
alkaline phosphatase,P00634,3.1.3.1,Escherichia coli,3TG0,A,mutant T155M,H2O + 4-Nitrophenyl phosphate = Phosphate + p-Nitrophenol,4-Nitrophenyl phosphate,,Phosphate;p-Nitrophenol,25,8,-6.118479253,11099386
alkaline phosphatase,P00634,3.1.3.1,Escherichia coli,3TG0,A,mutant D153N,H2O + 4-Nitrophenyl phosphate = Phosphate + p-Nitrophenol,4-Nitrophenyl phosphate,,Phosphate;p-Nitrophenol,25,8,0.69174104,1525159
fructose-bisphosphatase,P00636,3.1.3.11,Sus scrofa,1EYK,A,mutant D187A,"H2O + D-Fructose 1,6-bisphosphate = Phosphate + D-Fructose 6-phosphate","D-Fructose 1,6-bisphosphate",OC1C(COP(O)(O)=O)OC(O)(COP(O)(O)=O)C1(O),D-Fructose 6-phosphate;Phosphate,30,7.5,0.739667196,9030572
fructose-bisphosphatase,P00636,3.1.3.11,Sus scrofa,1EYK,A,mutant E192Q,"H2O + D-Fructose 1,6-bisphosphate = Phosphate + D-Fructose 6-phosphate","D-Fructose 1,6-bisphosphate",OC1C(COP(O)(O)=O)OC(O)(COP(O)(O)=O)C1(O),Phosphate;D-Fructose 6-phosphate,30,7.5,-0.613104473,9030572
fructose-bisphosphatase,P00636,3.1.3.11,Sus scrofa,1EYK,A,mutant E192A,"H2O + D-Fructose 1,6-bisphosphate = Phosphate + D-Fructose 6-phosphate","D-Fructose 1,6-bisphosphate",OC1C(COP(O)(O)=O)OC(O)(COP(O)(O)=O)C1(O),Phosphate;D-Fructose 6-phosphate,30,7.5,-1.193922469,9030572
fructose-bisphosphatase,P00636,3.1.3.11,Sus scrofa,1EYK,A,mutant R22A,"H2O + D-Fructose 1,6-bisphosphate = Phosphate + D-Fructose 6-phosphate","D-Fructose 1,6-bisphosphate",OC1C(COP(O)(O)=O)OC(O)(COP(O)(O)=O)C1(O),Phosphate;D-Fructose 6-phosphate,30,7.5,0.492476485,7577911
fructose-bisphosphatase,P00636,3.1.3.11,Sus scrofa,1EYK,A,mutant R243A,"H2O + D-Fructose 1,6-bisphosphate = Phosphate + D-Fructose 6-phosphate","D-Fructose 1,6-bisphosphate",OC1C(COP(O)(O)=O)OC(O)(COP(O)(O)=O)C1(O),D-Fructose 6-phosphate;Phosphate,30,7.5,-3.797004311,7989306
fructose-bisphosphatase,P00636,3.1.3.11,Sus scrofa,1FBH,A,mutant A54L,"H2O + D-Fructose 1,6-bisphosphate = Phosphate + D-Fructose 6-phosphate","D-Fructose 1,6-bisphosphate",OC1C(COP(O)(O)=O)OC(O)(COP(O)(O)=O)C1(O),D-Fructose 6-phosphate;Phosphate,22,7.5,-0.326732587,15767255
beta-galactosidase,P00722,3.2.1.23,Escherichia coli,1DP0,A,mutant H540F,H2O + 4-Nitrophenyl-alpha-L-arabinopyranoside = alpha-L-Arabinose + p-Nitrophenol,4-Nitrophenyl-alpha-L-arabinopyranoside,C1[C@@H]([C@@H]([C@H]([C@@H](O1)OC2=CC=C(C=C2)[N+](=O)[O-])O)O)O,alpha-L-Arabinose;p-Nitrophenol,25,7,0.137804293,8662937
beta-galactosidase,P00722,3.2.1.23,Escherichia coli,1JYV,A,mutant E461D,H2O + o-Nitrophenyl-beta-D-galactoside = beta-D-Galactose + o-Nitrophenol,o-Nitrophenyl-beta-D-galactopyranoside,,o-Nitrophenol;beta-D-Galactose,25,7,-6.214608098,1969405
beta-galactosidase,P00722,3.2.1.23,Escherichia coli,1JYW,A,mutant E461D,H2O + p-Nitrophenyl-beta-D-galactoside = beta-D-Galactose + p-Nitrophenol,4-Nitrophenyl-beta-D-galactopyranoside,,beta-D-Galactose;p-Nitrophenol,25,7,-8.221963342,1969405
beta-galactosidase,P00722,3.2.1.23,Escherichia coli,1JYV,A,mutant W999F,H2O + o-Nitrophenyl-beta-D-galactoside = beta-D-Galactose + o-Nitrophenol,2-Nitrophenyl-beta-D-galactopyranoside,,beta-D-Galactose;o-Nitrophenol,25,7,-3.181135495,12578395
beta-galactosidase,P00722,3.2.1.23,Escherichia coli,1JYW,A,mutant W999F,H2O + p-Nitrophenyl-beta-D-galactoside = beta-D-Galactose + p-Nitrophenol,4-Nitrophenyl-beta-D-galactopyranoside,,p-Nitrophenol;beta-D-Galactose,25,7,-2.670022809,12578395
beta-galactosidase,P00722,3.2.1.23,Escherichia coli,1JYV,A,mutant H391E,H2O + o-Nitrophenyl-beta-D-galactoside = beta-D-Galactose + o-Nitrophenol,2-Nitrophenyl-beta-D-galactopyranoside,,o-Nitrophenol;beta-D-Galactose,25,7,-9.212567689,11310566
beta-galactosidase,P00722,3.2.1.23,Escherichia coli,1JYW,A,mutant H391E,H2O + p-Nitrophenyl-beta-D-galactoside = beta-D-Galactose + p-Nitrophenol,4-Nitrophenyl-beta-D-galactopyranoside,,p-Nitrophenol;beta-D-Galactose,25,7,-9.863044083,11310566
beta-galactosidase,P00722,3.2.1.23,Escherichia coli,1JYW,A,mutant H357D,H2O + p-Nitrophenyl-beta-D-galactoside = beta-D-Galactose + p-Nitrophenol,4-Nitrophenyl-beta-D-galactopyranoside,,beta-D-Galactose;p-Nitrophenol,25,7,-4.187434995,9665715
beta-galactosidase,P00722,3.2.1.23,Escherichia coli,1JYV,A,mutant E461K,H2O + o-Nitrophenyl-beta-D-galactoside = beta-D-Galactose + o-Nitrophenol,o-Nitrophenyl-beta-D-galactopyranoside,,o-Nitrophenol;beta-D-Galactose,25,7,-4.889274447,1969405
beta-galactosidase,P00722,3.2.1.23,Escherichia coli,1DP0,A,mutant H357N,"H2O + 3,4-Dinitrophenyl-beta-D-galactopyranoside = beta-D-Galactose + 3,4-Dinitrophenol","3,4-Dinitrophenyl-beta-D-galactopyranoside",c1cc(c(cc1O[C@@H]2[C@H]([C@H]([C@H](O[C@H]2[O-])CO)O)O)[N+](=O)[O-])[N+](=O)[O-],"beta-D-Galactose;3,4-Dinitrophenol",25,7,1.673976434,9665715
subtilisin,P00782,3.4.21.62,Bacillus amyloliquefaciens,2ST1,A,mutant M222C,Succinyl-Ala-Ala-Pro-Phe-p-nitroanilide + H2O = Succinyl-Ala-Ala-Pro-Phe + 4-Nitroaniline,Succinyl-Ala-Ala-Pro-Phe-p-nitroanilide,C[C@@H](C(=O)N[C@@H](C)C(=O)N1CCC[C@H]1C(=O)N[C@@H](Cc2ccccc2)C(=O)Nc3ccc(cc3)[N+](=O)[O-])NC(=O)CCC(=O)O,Succinyl-Ala-Ala-Pro-Phe;4-Nitroaniline,25,8.6,-0.713349887,3922976
subtilisin,P00782,3.4.21.62,Bacillus amyloliquefaciens,2ST1,A,mutant N155L,Succinyl-Ala-Ala-Pro-Phe-p-nitroanilide + H2O = Succinyl-Ala-Ala-Pro-Phe + 4-Nitroaniline,Succinyl-Ala-Ala-Pro-Phe-p-nitroanilide,C[C@@H](C(=O)N[C@@H](C)C(=O)N1CCC[C@H]1C(=O)N[C@@H](Cc2ccccc2)C(=O)Nc3ccc(cc3)[N+](=O)[O-])NC(=O)CCC(=O)O,Succinyl-Ala-Ala-Pro-Phe;4-Nitroaniline,25,8,-5.654025458,3520553
signal peptidase I,P00803,3.4.21.89,Escherichia coli,1B12,A,mutant R77A,H2O + Peptide = Peptide + Peptide,Peptide,[*]C(N)C(=O)NC([*])C(O)=O,Peptide,37,7.7,-2.011661527,15195997
signal peptidase I,P00803,3.4.21.89,Escherichia coli,1B12,A,mutant R127A,H2O + Peptide = Peptide + Peptide,Peptide,[*]C(N)C(=O)NC([*])C(O)=O,Peptide,37,7.7,-0.205975748,15195997
signal peptidase I,P00803,3.4.21.89,Escherichia coli,1B12,A,mutant R198A,H2O + Peptide = Peptide + Peptide,Peptide,[*]C(N)C(=O)NC([*])C(O)=O,Peptide,37,7.7,-0.263447102,15195997
signal peptidase I,P00803,3.4.21.89,Escherichia coli,1B12,A,mutant R199A,H2O + Peptide = Peptide + Peptide,Peptide,[*]C(N)C(=O)NC([*])C(O)=O,Peptide,37,7.7,-0.15415068,15195997
signal peptidase I,P00803,3.4.21.89,Escherichia coli,1B12,A,mutant R222A,H2O + Peptide = Peptide + Peptide,Peptide,[*]C(N)C(=O)NC([*])C(O)=O,Peptide,37,7.7,-1.707131884,15195997
signal peptidase I,P00803,3.4.21.89,Escherichia coli,1B12,A,mutant R226A,H2O + Peptide = Peptide + Peptide,Peptide,[*]C(N)C(=O)NC([*])C(O)=O,Peptide,37,7.7,-0.405465108,15195997
signal peptidase I,P00803,3.4.21.89,Escherichia coli,1B12,A,mutant R236A,H2O + Peptide = Peptide + Peptide,Peptide,[*]C(N)C(=O)NC([*])C(O)=O,Peptide,37,7.7,-0.097693971,15195997
signal peptidase I,P00803,3.4.21.89,Escherichia coli,1B12,A,mutant R275A,H2O + Peptide = Peptide + Peptide,Peptide,[*]C(N)C(=O)NC([*])C(O)=O,Peptide,37,7.7,-0.037490609,15195997
signal peptidase I,P00803,3.4.21.89,Escherichia coli,1B12,A,mutant R282A,H2O + Peptide = Peptide + Peptide,Peptide,[*]C(N)C(=O)NC([*])C(O)=O,Peptide,37,7.7,-0.124297717,15195997
signal peptidase I,P00803,3.4.21.89,Escherichia coli,1B12,A,mutant R295A,H2O + Peptide = Peptide + Peptide,Peptide,[*]C(N)C(=O)NC([*])C(O)=O,Peptide,37,7.7,-0.182321557,15195997
signal peptidase I,P00803,3.4.21.89,Escherichia coli,1B12,A,mutant R315A,H2O + Peptide = Peptide + Peptide,Peptide,[*]C(N)C(=O)NC([*])C(O)=O,Peptide,37,7.7,-1.315283325,15195997
signal peptidase I,P00803,3.4.21.89,Escherichia coli,1B12,A,mutant R318A,H2O + Peptide = Peptide + Peptide,Peptide,[*]C(N)C(=O)NC([*])C(O)=O,Peptide,37,7.7,-2.701577687,15195997
beta-lactamase,P00811,3.5.2.6,Escherichia coli,2BLS,A,mutant T316V,Penicillin G + H2O = Substituted beta-amino acid,Penicillin G,,Substituted beta-amino acid,30,7,-1.599243677,8042993
exo-alpha-sialidase,P03474,3.2.1.18,Influenza B virus,1B9V,A,mutant E117G,2'-(4-MethylMbelliferyl)-alpha-D-N-acetylneuraminic acid + H2O = 4-MethylMbelliferone + N-Acetylneuraminate,2'-(4-Methylumbelliferyl)-alpha-D-N-acetylneuraminic acid,,4-MethylMbelliferone;N-Acetylneuraminate,37,6,-0.510825656,9874196
exo-alpha-sialidase,P03474,3.2.1.18,Influenza B virus,1B9V,A,mutant D149E,2'-(4-MethylMbelliferyl)-alpha-D-N-acetylneuraminic acid + H2O = 4-MethylMbelliferone + N-Acetylneuraminate,2'-(4-Methylumbelliferyl)-alpha-D-N-acetylneuraminic acid,,4-MethylMbelliferone;N-Acetylneuraminate,37,6,-0.888119954,9874196
exo-alpha-sialidase,P03474,3.2.1.18,Influenza B virus,1B9V,A,mutant R150K,2'-(4-MethylMbelliferyl)-alpha-D-N-acetylneuraminic acid + H2O = 4-MethylMbelliferone + N-Acetylneuraminate,2'-(4-Methylumbelliferyl)-alpha-D-N-acetylneuraminic acid,,4-MethylMbelliferone;N-Acetylneuraminate,37,6,-0.040822027,9874196
exo-alpha-sialidase,P03474,3.2.1.18,Influenza B virus,1B9V,A,mutant R223K,2'-(4-MethylMbelliferyl)-alpha-D-N-acetylneuraminic acid + H2O = 4-MethylMbelliferone + N-Acetylneuraminate,2'-(4-Methylumbelliferyl)-alpha-D-N-acetylneuraminic acid,,N-Acetylneuraminate;4-MethylMbelliferone,37,6,-0.46570515,9874196
exo-alpha-sialidase,P03474,3.2.1.18,Influenza B virus,1B9V,A,mutant E275D,2'-(4-MethylMbelliferyl)-alpha-D-N-acetylneuraminic acid + H2O = 4-MethylMbelliferone + N-Acetylneuraminate,2'-(4-Methylumbelliferyl)-alpha-D-N-acetylneuraminic acid,,4-MethylMbelliferone;N-Acetylneuraminate,37,6,0.182321525,9874196
exo-alpha-sialidase,P03474,3.2.1.18,Influenza B virus,1B9V,A,mutant R374N,2'-(4-MethylMbelliferyl)-alpha-D-N-acetylneuraminic acid + H2O = 4-MethylMbelliferone + N-Acetylneuraminate,2'-(4-Methylumbelliferyl)-alpha-D-N-acetylneuraminic acid,,4-MethylMbelliferone;N-Acetylneuraminate,37,6,-2.844181757,9874196
beta-lactamase,P04190,3.5.2.6,Bacillus cereus,1BC2,A,mutant D90E,H2O + Nitrocefin = Substituted beta-amino acid,Nitrocefin,c1cc(sc1)CC(=O)N[C@H]2[C@@H]3N(C2=O)C(=C(CS3)/C=C/c4ccc(cc4[N+](=O)[O-])[N+](=O)[O-])C(=O)O,Substituted beta-amino acid,30,7.5,-4.204518047,17426028
beta-lactamase,P04190,3.5.2.6,Bacillus cereus,1BC2,A,mutant H86S,Penicillin G + H2O = Substituted beta-amino acid,Penicillin G,,Substituted beta-amino acid,30,7.5,-2.72501028,11964169
beta-lactamase,P04190,3.5.2.6,Bacillus cereus,1BC2,A,mutant H88S,Penicillin G + H2O = Substituted beta-amino acid,Penicillin G,,Substituted beta-amino acid,30,7.5,-4.459426329,11964169
beta-lactamase,P04190,3.5.2.6,Bacillus cereus,1BC2,A,mutant H149S,Penicillin G + H2O = Substituted beta-amino acid,Penicillin G,,Substituted beta-amino acid,30,7.5,-7.004592319,11964169
beta-lactamase,P04190,3.5.2.6,Bacillus cereus,1BC2,A,mutant C168S,Penicillin G + H2O = Substituted beta-amino acid,Penicillin G,,Substituted beta-amino acid,30,7.5,-3.757545486,11964169
beta-lactamase,P04190,3.5.2.6,Bacillus cereus,1BC2,A,mutant H210S,H2O + Nitrocefin = Substituted beta-amino acid,Nitrocefin,c1cc(sc1)CC(=O)N[C@H]2[C@@H]3N(C2=O)C(=C(CS3)/C=C/c4ccc(cc4[N+](=O)[O-])[N+](=O)[O-])C(=O)O,Substituted beta-amino acid,30,7.5,-7.201508581,11964169
alpha-amylase,P04746,3.2.1.1,Homo sapiens,1HNY,A,mutant N298S,H2O + Maltotriose = Maltose + alpha-D-Glucose,Maltotriose,OCC3OC(OC1C(O)C(O)C(OC1(CO))OC2C(O)C(O)C(O)OC2(CO))C(O)C(O)C3(O),alpha-D-Glucose;Maltose,30,7,-1.02146483,15722449
beta-lactamase,P05364,3.5.2.6,Enterobacter cloacae,1XX2,A,mutant Y221G,H2O + Ceftazidime = Substituted beta-amino acid,Ceftazidime,[H]C34(C(NC(=O)C(=NOC(C)(C)C(O)=O)c1csc(N)n1)C(=O)N4(C(C(=O)[O-])=C(C[n+]2ccccc2)CS3)),Substituted beta-amino acid,30,7,2.704726238,11591698
beta-lactamase,P05364,3.5.2.6,Enterobacter cloacae,1XX2,A,mutant N346A,H2O + Ceftazidime = Substituted beta-amino acid,Ceftazidime,[H]C34(C(NC(=O)C(=NOC(C)(C)C(O)=O)c1csc(N)n1)C(=O)N4(C(C(=O)[O-])=C(C[n+]2ccccc2)CS3)),Substituted beta-amino acid,30,7,0.816045132,11591698
beta-lactamase,P05364,3.5.2.6,Enterobacter cloacae,1XX2,A,mutant N346I,H2O + Ceftazidime = Substituted beta-amino acid,Ceftazidime,[H]C34(C(NC(=O)C(=NOC(C)(C)C(O)=O)c1csc(N)n1)C(=O)N4(C(C(=O)[O-])=C(C[n+]2ccccc2)CS3)),Substituted beta-amino acid,30,7,0.218256615,11591698
beta-lactamase,P05364,3.5.2.6,Enterobacter cloacae,1XX2,A,mutant L293C,H2O + Ceftazidime = Substituted beta-amino acid,Ceftazidime,[H]C34(C(NC(=O)C(=NOC(C)(C)C(O)=O)c1csc(N)n1)C(=O)N4(C(C(=O)[O-])=C(C[n+]2ccccc2)CS3)),Substituted beta-amino acid,30,7,0.925478998,11591698
penicillin amidase,P06875,3.5.1.11,Escherichia coli,1PNK,B,mutant F24A,H2O + 2-Nitro-5-[(Phenylacetyl)amino]benzoic acid = 5-Amino-2-nitrobenzoic acid + Phenylacetic acid,2-Nitro-5-[(Phenylacetyl)amino]benzoic acid,,5-Amino-2-nitrobenzoic acid;Phenylacetic acid,30,7,-5.223728478,11985586
penicillin amidase,P06875,3.5.1.11,Escherichia coli,1PNK,B,mutant F57A,H2O + 2-Nitro-5-[(Phenylacetyl)amino]benzoic acid = 5-Amino-2-nitrobenzoic acid + Phenylacetic acid,2-Nitro-5-[(Phenylacetyl)amino]benzoic acid,,5-Amino-2-nitrobenzoic acid;Phenylacetic acid,30,7,-0.932627151,11985586
penicillin amidase,P06875,3.5.1.11,Escherichia coli,1PNK,A,mutant F146Y,H2O + 2-Phenylacetamide = NH3 + Phenylacetic acid,2-Phenylacetamide,NC(=O)Cc1ccccc1,Phenylacetic acid;NH3,30,7,0.470003629,11239085
penicillin amidase,P06875,3.5.1.11,Escherichia coli,1GM7,A,mutant F146Y,H2O + Penicillin G = 2-Phenyl acetate + 6-Aminopenicillanate,Penicillin G,,2-Phenyl acetate;6-Aminopenicillanate,30,7,-2.995732274,11239085
arginase,P07824,3.5.3.1,Rattus norvegicus,1RLA,A,mutant D232A,H2O + L-Arginine = L-Ornithine + Urea,L-Arginine,NC(=N)NCCCC(N)C(O)=O,L-Ornithine;Urea,-,9,-10.07784094,12820884
arginase,P07824,3.5.3.1,Rattus norvegicus,1RLA,A,mutant D128E,H2O + L-Arginine = L-Ornithine + Urea,L-Arginine,NC(=N)NCCCC(N)C(O)=O,L-Ornithine;Urea,-,9,-8.180720957,12820884
arginase,P07824,3.5.3.1,Rattus norvegicus,1RLA,A,mutant D234E,H2O + L-Arginine = L-Ornithine + Urea,L-Arginine,NC(=N)NCCCC(N)C(O)=O,L-Ornithine;Urea,-,9,-4.214209766,12820884
arginase,P07824,3.5.3.1,Rattus norvegicus,1RLA,A,mutant H101E,H2O + L-Arginine = L-Ornithine + Urea,L-Arginine,NC(=N)NCCCC(N)C(O)=O,Urea;L-Ornithine,-,9,-4.208479248,12820884
arginase,P07824,3.5.3.1,Rattus norvegicus,1RLA,A,mutant G235A,H2O + L-Arginine = L-Ornithine + Urea,L-Arginine,NC(=N)NCCCC(N)C(O)=O,L-Ornithine;Urea,-,9,-0.384411699,11883902
arginase,P07824,3.5.3.1,Rattus norvegicus,1RLA,A,mutant H141N,H2O + L-Arginine = L-Ornithine + Urea,L-Arginine,NC(=N)NCCCC(N)C(O)=O,L-Ornithine;Urea,22,9,-4.337690966,16266687
fructose-bisphosphatase,P09467,3.1.3.11,Homo sapiens,1FTA,A,mutant E20K,"H2O + D-Fructose 1,6-bisphosphate = Phosphate + D-Fructose 6-phosphate","D-Fructose 1,6-bisphosphate",,D-Fructose 6-phosphate;Phosphate,37,7.5,-0.202763184,16213487
aryldialkylphosphatase,P0A434,3.1.8.1,Brevundimonas diminuta,1HZY,A,mutant H55N,H2O + Paraoxon = Diethylphosphoric acid + p-Nitrophenol(Zn),Paraoxon,CCOP(=O)(OCC)Oc1ccc(cc1)[N+](=O)[O-],p-Nitrophenol;Diethylphosphoric acid,25,9,-6.480074997,8155644
aryldialkylphosphatase,P0A434,3.1.8.1,Brevundimonas diminuta,1HZY,A,mutant H57N,H2O + Paraoxon = Diethylphosphoric acid + p-Nitrophenol(Zn),Paraoxon,CCOP(=O)(OCC)Oc1ccc(cc1)[N+](=O)[O-],p-Nitrophenol;Diethylphosphoric acid,25,9,-2.356404606,8155644
aryldialkylphosphatase,P0A434,3.1.8.1,Brevundimonas diminuta,1HZY,A,mutant H123N,H2O + Paraoxon = Diethylphosphoric acid + p-Nitrophenol(Zn),Paraoxon,CCOP(=O)(OCC)Oc1ccc(cc1)[N+](=O)[O-],p-Nitrophenol;Diethylphosphoric acid,25,9,-0.030347156,8155644
aryldialkylphosphatase,P0A434,3.1.8.1,Brevundimonas diminuta,1HZY,A,mutant H201N,H2O + Paraoxon = Diethylphosphoric acid + p-Nitrophenol(Zn),Paraoxon,CCOP(=O)(OCC)Oc1ccc(cc1)[N+](=O)[O-],p-Nitrophenol;Diethylphosphoric acid,25,9,-2.97461299,8155644
aryldialkylphosphatase,P0A434,3.1.8.1,Brevundimonas diminuta,1HZY,A,mutant H230N,H2O + Paraoxon = Diethylphosphoric acid + p-Nitrophenol(Zn),Paraoxon,CCOP(=O)(OCC)Oc1ccc(cc1)[N+](=O)[O-],Diethylphosphoric acid;p-Nitrophenol,25,9,-4.467752779,8155644
aryldialkylphosphatase,P0A434,3.1.8.1,Brevundimonas diminuta,1HZY,A,mutant H254N,H2O + Paraoxon = Diethylphosphoric acid + p-Nitrophenol(Zn),Paraoxon,CCOP(=O)(OCC)Oc1ccc(cc1)[N+](=O)[O-],p-Nitrophenol;Diethylphosphoric acid,25,9,-0.257160437,8155644
aryldialkylphosphatase,P0A434,3.1.8.1,Brevundimonas diminuta,1HZY,A,mutant H257N,H2O + Paraoxon = Diethylphosphoric acid + p-Nitrophenol(Zn),Paraoxon,CCOP(=O)(OCC)Oc1ccc(cc1)[N+](=O)[O-],Diethylphosphoric acid;p-Nitrophenol,25,9,-1.441715155,8155644
methionine adenosyltransferase,P0A817,2.5.1.6,Escherichia coli,1FUG,A,mutant K265A,H2O + Triphosphate = Phosphate + Diphosphate,Triphosphate,,Phosphate;Diphosphate,-,7.8,-3.022640063,10660564
methionine adenosyltransferase,P0A817,2.5.1.6,Escherichia coli,1FUG,A,mutant K269M,H2O + Triphosphate = Phosphate + Diphosphate,Triphosphate,,Diphosphate;Phosphate,-,7.8,-3.352407217,10660564
methionine adenosyltransferase,P0A817,2.5.1.6,Escherichia coli,1FUG,B,mutant H14N,H2O + Triphosphate = Phosphate + Diphosphate,Triphosphate,,Phosphate;Diphosphate,-,7.8,-6.767993337,10660564
methionine adenosyltransferase,P0A817,2.5.1.6,Escherichia coli,1FUG,B,mutant K165M,H2O + Triphosphate = Phosphate + Diphosphate,Triphosphate,,Phosphate;Diphosphate,-,7.8,-1.86263386,10660564
beta-lactamase,P0AD64,3.5.2.6,Klebsiella pneumoniae,2G2U,A,mutant G238S,H2O + Nitrocefin = Substituted beta-amino acid,Nitrocefin,c1cc(sc1)CC(=O)N[C@H]2[C@@H]3N(C2=O)C(=C(CS3)/C=C/c4ccc(cc4[N+](=O)[O-])[N+](=O)[O-])C(=O)O,Substituted beta-amino acid,22,7.4,-0.752180712,16982784
beta-lactamase,P0AD64,3.5.2.6,Klebsiella pneumoniae,2G2U,A,mutant D104K,H2O + Nitrocefin = Substituted beta-amino acid,Nitrocefin,c1cc(sc1)CC(=O)N[C@H]2[C@@H]3N(C2=O)C(=C(CS3)/C=C/c4ccc(cc4[N+](=O)[O-])[N+](=O)[O-])C(=O)O,Substituted beta-amino acid,22,7.4,0.373099824,16982784
beta-lactamase,P0AD64,3.5.2.6,Klebsiella pneumoniae,2G2U,A,mutant D104K,H2O + Ampicillin = Substituted beta-amino acid,Ampicillin,,Substituted beta-amino acid,22,7.4,-0.300104593,16982784
beta-lactamase,P0AD64,3.5.2.6,Klebsiella pneumoniae,2G2U,A,mutant G238S,H2O + Cephalothin = Substituted beta-amino acid,Cephalothin,[H]C23(C(NC(=O)Cc1cccs1)C(=O)N3(C(C(O)=O)=C(COC(C)=O)CS2)),Substituted beta-amino acid,22,7.4,2.166452919,16982784
methionyl aminopeptidase,P0AE18,3.4.11.18,Escherichia coli,1MAT,A,mutant H178A,H2O + Met-Gly-Met-Met = L-Methionine + Gly-Met-Met(Co),Met-Gly-Met-Met,,Gly-Met-Met;L-Methionine,30,7.5,-4.279747786,12755633
pectinesterase,P0C1A8,3.1.1.11,Erwinia chrysanthemi,1QJV,A,mutant Q153A,Pectin + H2O = Methanol + Pectate,Pectin,,Pectate;Methanol,30,7,-3.491188404,17717531
pectinesterase,P0C1A8,3.1.1.11,Erwinia chrysanthemi,1QJV,A,mutant Q177A,Pectin + H2O = Methanol + Pectate,Pectin,,Pectate;Methanol,30,7,-2.946461224,17717531
pectinesterase,P0C1A8,3.1.1.11,Erwinia chrysanthemi,1QJV,A,mutant V198A,Pectin + H2O = Methanol + Pectate,Pectin,,Pectate;Methanol,30,7,-1.11654999,17717531
pectinesterase,P0C1A8,3.1.1.11,Erwinia chrysanthemi,1QJV,A,mutant T272A,Pectin + H2O = Methanol + Pectate,Pectin,,Methanol;Pectate,30,7,-1.836014478,17717531
pectinesterase,P0C1A8,3.1.1.11,Erwinia chrysanthemi,1QJV,A,mutant M306A,Pectin + H2O = Methanol + Pectate,Pectin,,Methanol;Pectate,30,7,-3.437052693,17717531
protein-tyrosine-phosphatase,P11064,3.1.3.48,Bos taurus,1PHR,A,mutant R53N,H2O + 4-Nitrophenyl phosphate = Phosphate + p-Nitrophenol,4-Nitrophenyl phosphate,,p-Nitrophenol;Phosphate,37,5.5,-2.687863107,8576228
protein-tyrosine-phosphatase,P11064,3.1.3.48,Bos taurus,1PHR,A,mutant R64K,H2O + 4-Nitrophenyl phosphate = Phosphate + p-Nitrophenol,4-Nitrophenyl phosphate,,p-Nitrophenol;Phosphate,37,5.5,-1.433031833,8576228
protein-tyrosine-phosphatase,P11064,3.1.3.48,Bos taurus,1PHR,A,mutant D48T,H2O + Phosphotyrosine = Phosphate + Tyrosine,Phosphotyrosine,NC(Cc1ccc(cc1)OP(O)(O)=O)C(O)=O,Phosphate;Tyrosine,37,5.5,0.535714682,8576228
protein-tyrosine-phosphatase,P11064,3.1.3.48,Bos taurus,1PHR,A,mutant W49Y,H2O + Phosphotyrosine = Phosphate + Tyrosine,Phosphotyrosine,NC(Cc1ccc(cc1)OP(O)(O)=O)C(O)=O,Tyrosine;Phosphate,37,5.5,0.56739903,8576228
protein-tyrosine-phosphatase,P11064,3.1.3.48,Bos taurus,1PHR,A,mutant N50E,H2O + Phosphotyrosine = Phosphate + Tyrosine,Phosphotyrosine,NC(Cc1ccc(cc1)OP(O)(O)=O)C(O)=O,Tyrosine;Phosphate,37,5.5,2.341946706,8576228
protein-tyrosine-phosphatase,P11064,3.1.3.48,Bos taurus,1PHR,A,mutant K73I,H2O + Phosphotyrosine = Phosphate + Tyrosine,Phosphotyrosine,NC(Cc1ccc(cc1)OP(O)(O)=O)C(O)=O,Phosphate;Tyrosine,37,5.5,0.244251695,8576228
amidase,P11436,3.5.1.4,Pseudomonas aeruginosa,2UXY,A,mutant T103I,Acetamide + H2O = Acetate + NH3,Acetamide,,Acetate;NH3,25,7.2,0.563850065,16792995
amidase,P11436,3.5.1.4,Pseudomonas aeruginosa,2UXY,A,mutant C91A,Acetamide + H2O = Acetate + NH3,Acetamide,,NH3;Acetate,25,7.2,1.772051197,16792995
arginine deiminase,P13981,3.5.3.6,Pseudomonas aeruginosa,2A9G,A,mutant E224A,H2O + L-Arginine = L-Citrulline + NH3,L-Arginine,NC(=N)NCCCC(N)C(O)=O,L-Citrulline;NH3,25,5.6,-10.06731453,16430212
arginine deiminase,P13981,3.5.3.6,Pseudomonas aeruginosa,2A9G,A,mutant R185A,H2O + L-Arginine = L-Citrulline + NH3,L-Arginine,NC(=N)NCCCC(N)C(O)=O,L-Citrulline;NH3,25,5.6,-8.934393556,16430212
arginine deiminase,P13981,3.5.3.6,Pseudomonas aeruginosa,2A9G,A,mutant R243A,H2O + L-Arginine = L-Citrulline + NH3,L-Arginine,NC(=N)NCCCC(N)C(O)=O,NH3;L-Citrulline,25,5.6,-11.78736231,16430212
arginine deiminase,P13981,3.5.3.6,Pseudomonas aeruginosa,2A9G,A,mutant N160A,H2O + L-Arginine = L-Citrulline + NH3,L-Arginine,NC(=N)NCCCC(N)C(O)=O,NH3;L-Citrulline,25,5.6,-8.662861431,16430212
arginine deiminase,P13981,3.5.3.6,Pseudomonas aeruginosa,2A9G,A,mutant R401A,H2O + L-Arginine = L-Citrulline + NH3,L-Arginine,NC(=N)NCCCC(N)C(O)=O,L-Citrulline;NH3,25,5.6,-10.90315989,16430212
protein-tyrosine-phosphatase,P15273,3.1.3.48,Yersinia enterocolitica,1YTS,A,mutant R216A,H2O + 4-Nitrophenyl phosphate = Phosphate + p-Nitrophenol,4-Nitrophenyl phosphate,,Phosphate;p-Nitrophenol,30,6,-1.104672002,7803389
protein-tyrosine-phosphatase,P15273,3.1.3.48,Yersinia enterocolitica,1YTS,A,mutant R228A,H2O + 4-Nitrophenyl phosphate = Phosphate + p-Nitrophenol,4-Nitrophenyl phosphate,,p-Nitrophenol;Phosphate,30,6,-1.14786023,7803389
protein-tyrosine-phosphatase,P15273,3.1.3.48,Yersinia enterocolitica,1YTS,A,mutant R236A,H2O + 4-Nitrophenyl phosphate = Phosphate + p-Nitrophenol,4-Nitrophenyl phosphate,,p-Nitrophenol;Phosphate,30,6,-0.288544619,7803389
protein-tyrosine-phosphatase,P15273,3.1.3.48,Yersinia enterocolitica,1YTS,A,mutant R295A,H2O + 4-Nitrophenyl phosphate = Phosphate + p-Nitrophenol,4-Nitrophenyl phosphate,,p-Nitrophenol;Phosphate,30,6,0.154976714,7803389
protein-tyrosine-phosphatase,P15273,3.1.3.48,Yersinia enterocolitica,1YTS,A,mutant R409A,H2O + 4-Nitrophenyl phosphate = Phosphate + p-Nitrophenol,4-Nitrophenyl phosphate,,Phosphate;p-Nitrophenol,30,6,-12.24207536,7803389
protein-tyrosine-phosphatase,P15273,3.1.3.48,Yersinia enterocolitica,1YTS,A,mutant R437A,H2O + 4-Nitrophenyl phosphate = Phosphate + p-Nitrophenol,4-Nitrophenyl phosphate,,p-Nitrophenol;Phosphate,30,6,-3.649433551,7803389
protein-tyrosine-phosphatase,P15273,3.1.3.48,Yersinia enterocolitica,1YTS,A,mutant R440K,H2O + 4-Nitrophenyl phosphate = Phosphate + p-Nitrophenol,4-Nitrophenyl phosphate,,p-Nitrophenol;Phosphate,30,6,-5.928552786,7803389
protein-tyrosine-phosphatase,P15273,3.1.3.48,Yersinia enterocolitica,1YTS,A,mutant Q446A,H2O + 4-Nitrophenyl phosphate = Phosphate + p-Nitrophenol,4-Nitrophenyl phosphate,,p-Nitrophenol;Phosphate,30,7,0.11392394,9488671
protein-tyrosine-phosphatase,P15273,3.1.3.48,Yersinia enterocolitica,1YTS,A,mutant Q450A,H2O + 4-Nitrophenyl phosphate = Phosphate + p-Nitrophenol,4-Nitrophenyl phosphate,,p-Nitrophenol;Phosphate,30,7,-2.169778943,9488671
protein-tyrosine-phosphatase,P15273,3.1.3.48,Yersinia enterocolitica,1YTS,A,mutant Q446A,H2O + 4-Nitrophenyl phosphate = Phosphate + p-Nitrophenol,4-Nitrophenyl phosphate,,p-Nitrophenol;Phosphate,30,8,0.686076916,9488671
protein-tyrosine-phosphatase,P15273,3.1.3.48,Yersinia enterocolitica,1YTS,A,mutant Q450A,H2O + 4-Nitrophenyl phosphate = Phosphate + p-Nitrophenol,4-Nitrophenyl phosphate,,p-Nitrophenol;Phosphate,30,8,-2.232154574,9488671
beta-lactamase,P16897,3.5.2.6,Pseudomonas aeruginosa,1G68,A,mutant R234K,Penicillin G + H2O = Substituted beta-amino acid,Penicillin G,,Substituted beta-amino acid,30,7,-1.289555172,11148033
acetylcholinesterase,P21836,3.1.1.7,Mus musculus,2HA5,A,mutant Y72N,H2O + Acetylthiocholine = Acetate + Thiocholine,Acetylthiocholine,,Thiocholine;Acetate,22,7,-0.945946938,8218285
acetylcholinesterase,P21836,3.1.1.7,Mus musculus,2HA5,A,mutant D74N,H2O + Acetylthiocholine = Acetate + Thiocholine,Acetylthiocholine,,Acetate;Thiocholine,22,7,-3.852303769,8218285
acetylcholinesterase,P21836,3.1.1.7,Mus musculus,2HA5,A,mutant Y124Q,H2O + Acetylthiocholine = Acetate + Thiocholine,Acetylthiocholine,,Acetate;Thiocholine,22,7,-1.200012404,8218285
acetylcholinesterase,P21836,3.1.1.7,Mus musculus,2HA5,A,mutant W286R,H2O + Acetylthiocholine = Acetate + Thiocholine,Acetylthiocholine,,Acetate;Thiocholine,22,7,-2.07808192,8218285
acetylcholinesterase,P21836,3.1.1.7,Mus musculus,2HA5,A,mutant F295Y,H2O + Acetylthiocholine = Acetate + Thiocholine,Acetylthiocholine,,Thiocholine;Acetate,22,7,-2.137925594,8218285
acetylcholinesterase,P21836,3.1.1.7,Mus musculus,2HA5,A,mutant F297Y,H2O + Acetylthiocholine = Acetate + Thiocholine,Acetylthiocholine,,Acetate;Thiocholine,22,7,-1.509882389,8218285
acetylcholinesterase,P21836,3.1.1.7,Mus musculus,2HA5,A,mutant Y337A,H2O + Acetylthiocholine = Acetate + Thiocholine,Acetylthiocholine,,Thiocholine;Acetate,22,7,-1.862237672,8218285
acetylcholinesterase,P21836,3.1.1.7,Mus musculus,2HA5,A,mutant F338G,H2O + Acetylthiocholine = Acetate + Thiocholine,Acetylthiocholine,,Acetate;Thiocholine,22,7,-2.294994923,8218285
acetylcholinesterase,P21836,3.1.1.7,Mus musculus,2HA5,A,mutant R296S,H2O + Acetylthiocholine = Acetate + Thiocholine,Acetylthiocholine,,Thiocholine;Acetate,22,7,-0.503235455,8218285
acetylcholinesterase,P21836,3.1.1.7,Mus musculus,2HA5,A,mutant V300G,H2O + Acetylthiocholine = Acetate + Thiocholine,Acetylthiocholine,,Acetate;Thiocholine,22,7,0.050149786,8218285
acetylcholinesterase,P22303,3.1.1.7,Homo sapiens,4PQE,A,mutant Y72A,H2O + Acetylthiocholine = Acetate + Thiocholine,Acetylthiocholine,,Acetate;Thiocholine,27,8,-0.180126167,8119978
acetylcholinesterase,P22303,3.1.1.7,Homo sapiens,4PQE,A,mutant D74N,H2O + Acetylthiocholine = Acetate + Thiocholine,Acetylthiocholine,,Thiocholine;Acetate,27,8,-2.128231705,8119978
acetylcholinesterase,P22303,3.1.1.7,Homo sapiens,4PQE,A,mutant Y124A,H2O + Acetylthiocholine = Acetate + Thiocholine,Acetylthiocholine,,Thiocholine;Acetate,27,8,-1.252762968,8119978
acetylcholinesterase,P22303,3.1.1.7,Homo sapiens,4PQE,A,mutant E285A,H2O + Acetylthiocholine = Acetate + Thiocholine,Acetylthiocholine,,Thiocholine;Acetate,27,8,-0.947381319,8119978
acetylcholinesterase,P22303,3.1.1.7,Homo sapiens,4PQE,A,mutant Y341A,H2O + Acetylthiocholine = Acetate + Thiocholine,Acetylthiocholine,,Acetate;Thiocholine,27,8,-1.435084524,8119978
acetylcholinesterase,P22303,3.1.1.7,Homo sapiens,4PQE,A,mutant F297A,H2O + Acetylthiocholine = Acetate + Thiocholine,Acetylthiocholine,,Thiocholine;Acetate,27,8,-2.201843523,8119978
acetylcholinesterase,P22303,3.1.1.7,Homo sapiens,4PQE,A,mutant F338A,H2O + Acetylthiocholine = Acetate + Thiocholine,Acetylthiocholine,,Acetate;Thiocholine,27,8,-1.058606955,8119978
acetylcholinesterase,P22303,3.1.1.7,Homo sapiens,4PQE,A,mutant E202A,H2O + Acetylthiocholine = Acetate + Thiocholine,Acetylthiocholine,,Acetate;Thiocholine,27,8,-5.158555424,1396557
acetylcholinesterase,P22303,3.1.1.7,Homo sapiens,4PQE,A,mutant W286A,H2O + p-Nitrophenyl acetate = Acetate + p-Nitrophenol,4-Nitrophenyl acetate,,Acetate;p-Nitrophenol,27,8,0.364897923,8349597
acetylcholinesterase,P22303,3.1.1.7,Homo sapiens,4PQE,A,mutant W86A,H2O + p-Nitrophenyl acetate = Acetate + p-Nitrophenol,4-Nitrophenyl acetate,,Acetate;p-Nitrophenol,27,8,1.176064016,8349597
acetylcholinesterase,P22303,3.1.1.7,Homo sapiens,4PQE,A,mutant F295A,H2O + Propionylthiocholine = Propanoate + Thiocholine,Propionylthiocholine,,Propanoate;Thiocholine,27,8,0.954792279,8349597
acetylcholinesterase,P22303,3.1.1.7,Homo sapiens,4PQE,A,mutant Y337F,H2O + Propionylthiocholine = Propanoate + Thiocholine,Propionylthiocholine,,Thiocholine;Propanoate,27,8,1.34576438,8349597
Carboxylic ester hydrolases,P23872,3.1.1,Escherichia coli,4KRX,A,mutant H103N,H2O + p-Nitrophenyl butyrate = Butanoate + p-Nitrophenol,p-Nitrophenyl butyrate,,Butanoate;p-Nitrophenol,25,7.1,-0.244403551,10431819
Carboxylic ester hydrolases,P23872,3.1.1,Escherichia coli,4KRX,A,mutant E128Q,H2O + p-Nitrophenyl butyrate = Butanoate + p-Nitrophenol,p-Nitrophenyl butyrate,,Butanoate;p-Nitrophenol,25,7.1,-1.072601247,10431819
Carboxylic ester hydrolases,P23872,3.1.1,Escherichia coli,4KRX,A,mutant G163A,H2O + p-Nitrophenyl butyrate = Butanoate + p-Nitrophenol,p-Nitrophenyl butyrate,,Butanoate;p-Nitrophenol,25,7.1,-2.366045447,10431819
Carboxylic ester hydrolases,P23872,3.1.1,Escherichia coli,4KRX,A,mutant D164A,H2O + p-Nitrophenyl butyrate = Butanoate + p-Nitrophenol,p-Nitrophenyl butyrate,,Butanoate;p-Nitrophenol,25,7.1,-9.085748494,10431819
Carboxylic ester hydrolases,P23872,3.1.1,Escherichia coli,4KRX,A,mutant G167A,H2O + p-Nitrophenyl butyrate = Butanoate + p-Nitrophenol,p-Nitrophenyl butyrate,,p-Nitrophenol;Butanoate,25,7.1,-0.917100121,10431819
Carboxylic ester hydrolases,P23872,3.1.1,Escherichia coli,4KRX,A,mutant D262A,H2O + p-Nitrophenyl butyrate = Butanoate + p-Nitrophenol,p-Nitrophenyl butyrate,,p-Nitrophenol;Butanoate,25,7.1,-6.589007387,10431819
Carboxylic ester hydrolases,P23872,3.1.1,Escherichia coli,4KRX,A,mutant D266A,H2O + p-Nitrophenyl butyrate = Butanoate + p-Nitrophenol,p-Nitrophenyl butyrate,,p-Nitrophenol;Butanoate,25,7.1,-2.206980752,10431819
"fructose-2,6-bisphosphate 2-phosphatase",P25114,3.1.3.46,Rattus norvegicus,1BIF,A,mutant T52A,"H2O + D-Fructose 2,6-bisphosphate = Phosphate + D-Fructose 6-phosphate","D-Fructose 2,6-bisphosphate",,D-Fructose 6-phosphate;Phosphate,25,7.5,0.3254224,9065453
"fructose-2,6-bisphosphate 2-phosphatase",P25114,3.1.3.46,Rattus norvegicus,1BIF,A,mutant D128N,"H2O + D-Fructose 2,6-bisphosphate = Phosphate + D-Fructose 6-phosphate","D-Fructose 2,6-bisphosphate",,Phosphate;D-Fructose 6-phosphate,25,7.5,0.207639365,9065453
"fructose-2,6-bisphosphate 2-phosphatase",P25114,3.1.3.46,Rattus norvegicus,1BIF,A,mutant T130A,"H2O + D-Fructose 2,6-bisphosphate = Phosphate + D-Fructose 6-phosphate","D-Fructose 2,6-bisphosphate",,Phosphate;D-Fructose 6-phosphate,25,7.5,0.3254224,9065453
"fructose-2,6-bisphosphate 2-phosphatase",P25114,3.1.3.46,Rattus norvegicus,1BIF,A,mutant N73A,"H2O + D-Fructose 2,6-bisphosphate = Phosphate + D-Fructose 6-phosphate","D-Fructose 2,6-bisphosphate",,D-Fructose 6-phosphate;Phosphate,25,7.5,-0.331357137,9065453
"fructose-2,6-bisphosphate 2-phosphatase",P25114,3.1.3.46,Rattus norvegicus,1BIF,A,mutant Y197F,"H2O + D-Fructose 2,6-bisphosphate = Phosphate + D-Fructose 6-phosphate","D-Fructose 2,6-bisphosphate",,Phosphate;D-Fructose 6-phosphate,25,7.5,-0.984498985,9065453
beta-lactamase,P25910,3.5.2.6,Bacteroides fragilis,1ZNB,A,mutant H99N,Penicillin G + H2O = Substituted beta-amino acid,Penicillin G,,Substituted beta-amino acid,25,7.2,-7.608019749,10336469
beta-lactamase,P25910,3.5.2.6,Bacteroides fragilis,1ZNB,A,mutant C181S,Penicillin G + H2O = Substituted beta-amino acid,Penicillin G,,Substituted beta-amino acid,25,7.2,-6.891000418,10336469
beta-lactamase,P25910,3.5.2.6,Bacteroides fragilis,1ZNB,A,mutant D103N,Penicillin G + H2O = Substituted beta-amino acid,Penicillin G,,Substituted beta-amino acid,25,7.2,-3.869950223,10336469
beta-lactamase,P25910,3.5.2.6,Bacteroides fragilis,1ZNB,A,mutant C104R,Penicillin G + H2O = Substituted beta-amino acid,Penicillin G,,Substituted beta-amino acid,25,7.2,-1.778086167,10336469
beta-lactamase,P25910,3.5.2.6,Bacteroides fragilis,1ZNB,A,mutant K184R,Penicillin G + H2O = Substituted beta-amino acid,Penicillin G,,Substituted beta-amino acid,25,7.2,-0.934954191,10336469
beta-lactamase,P25910,3.5.2.6,Bacteroides fragilis,1ZNB,A,mutant N193D,H2O + Cephaloridine = Substituted beta-amino acid,Cephaloridine,[H]C34(C(NC(=O)Cc1cccs1)C(=O)N4(C(C(=O)O)=C(C[n+]2ccccc2)CS3)),Substituted beta-amino acid,25,7.2,0.232339748,10336469
beta-lactamase,P26918,3.5.2.6,Aeromonas hydrophila,1X8G,A,mutant N116H,H2O + Nitrocefin = Substituted beta-amino acid,Nitrocefin,c1cc(sc1)CC(=O)N[C@H]2[C@@H]3N(C2=O)C(=C(CS3)/C=C/c4ccc(cc4[N+](=O)[O-])[N+](=O)[O-])C(=O)O,Substituted beta-amino acid,30,6.5,6.094605406,15863831
beta-lactamase,P26918,3.5.2.6,Aeromonas hydrophila,1X8G,A,mutant N220G,H2O + Nitrocefin = Substituted beta-amino acid,Nitrocefin,c1cc(sc1)CC(=O)N[C@H]2[C@@H]3N(C2=O)C(=C(CS3)/C=C/c4ccc(cc4[N+](=O)[O-])[N+](=O)[O-])C(=O)O,Substituted beta-amino acid,30,6.5,1.179280192,15863831
beta-lactamase,P26918,3.5.2.6,Aeromonas hydrophila,1X8G,A,mutant R121H,H2O + Nitrocefin = Substituted beta-amino acid,Nitrocefin,c1cc(sc1)CC(=O)N[C@H]2[C@@H]3N(C2=O)C(=C(CS3)/C=C/c4ccc(cc4[N+](=O)[O-])[N+](=O)[O-])C(=O)O,Substituted beta-amino acid,30,6.5,3.887330393,15863831
aryldialkylphosphatase,P27169,3.1.8.1,Homo sapiens,1V04,A,mutant H115Q,H2O + Paraoxon = Diethylphosphoric acid + p-Nitrophenol,Paraoxon,CCOP(=O)(OCC)Oc1ccc(cc1)[N+](=O)[O-],Diethylphosphoric acid;p-Nitrophenol,-,8,-1.886011672,16407305
aryldialkylphosphatase,P27169,3.1.8.1,Homo sapiens,1V04,A,mutant H134Q,H2O + Paraoxon = Diethylphosphoric acid + p-Nitrophenol,Paraoxon,CCOP(=O)(OCC)Oc1ccc(cc1)[N+](=O)[O-],Diethylphosphoric acid;p-Nitrophenol,-,8,1.243376617,16407305
dipeptidyl-peptidase IV,P27487,3.4.14.5,Homo sapiens,1PFQ,A,mutant Y547F,H2O + Gly-Pro-4-Nitroanilide = Gly-Pro + 4-Nitroaniline,Gly-Pro-4-Nitroanilide,C1C[C@H](N(C1)C(=O)CNC(=O)OCC2=CC=CC=C2)C(=O)NC3=CC=C(C=C3)[N+](=O)[O-],4-Nitroaniline;Gly-Pro,22,7.4,-7.343945396,15175333
tryptophanase,P28796,4.1.99.1,Proteus vulgaris,5W1B,A,mutant H458A,H2O + S-Ethyl-L-cysteine = NH3 + Pyruvate + Ethanethiol,S-Ethyl-L-cysteine,,Pyruvate;NH3;Ethanethiol,30,8,2.60093934,14503866
tryptophanase,P28796,4.1.99.1,Proteus vulgaris,5W1B,A,mutant D133A,H2O + S-Ethyl-L-cysteine = NH3 + Pyruvate + Ethanethiol,S-Ethyl-L-cysteine,,Ethanethiol;NH3;Pyruvate,30,8,1.821489635,14503866
tryptophanase,P28796,4.1.99.1,Proteus vulgaris,5W1B,B,mutant Y72F,H2O + S-Ethyl-L-cysteine = NH3 + Pyruvate + Ethanethiol,S-Ethyl-L-cysteine,,NH3;Ethanethiol;Pyruvate,30,7.8,0.422978691,16455316
alcohol dehydrogenase,P30838,1.1.1.1,Homo sapiens,3SZA,A,mutant E209Q,H2O + p-Nitrophenyl acetate = Acetate + p-Nitrophenol,4-Nitrophenyl acetate,,Acetate;p-Nitrophenol,25,7.4,-2.500069444,10548037
In phosphorous-containing anhydrides,P32056,3.6.1,Escherichia coli,2GT4,A,mutant R37Q,H2O + GDP-alpha-D-mannose = GDP + beta-D-Mannose,GDP-alpha-D-mannose,c1nc2c(=O)[nH]c(nc2n1[C@H]3[C@@H]([C@@H]([C@H](O3)COP(=O)(O)OP(=O)(O)O[C@@H]4[C@H]([C@H]([C@@H]([C@H](O4)CO)O)O)O)O)O)N,beta-D-Mannose;GDP,37,9.3,-5.315802045,15966723
In phosphorous-containing anhydrides,P32056,3.6.1,Escherichia coli,2GT4,A,mutant D22A,H2O + GDP-alpha-D-mannose = GDP + beta-D-Mannose,GDP-alpha-D-mannose,c1nc2c(=O)[nH]c(nc2n1[C@H]3[C@@H]([C@@H]([C@H](O3)COP(=O)(O)OP(=O)(O)O[C@@H]4[C@H]([C@H]([C@@H]([C@H](O4)CO)O)O)O)O)O)N,GDP;beta-D-Mannose,37,9.3,-6.3049301,15966723
In phosphorous-containing anhydrides,P32056,3.6.1,Escherichia coli,2GT4,A,mutant H124E,H2O + GDP-alpha-D-mannose = GDP + beta-D-Mannose,GDP-alpha-D-mannose,c1nc2c(=O)[nH]c(nc2n1[C@H]3[C@@H]([C@@H]([C@H](O3)COP(=O)(O)OP(=O)(O)O[C@@H]4[C@H]([C@H]([C@@H]([C@H](O4)CO)O)O)O)O)O)N,beta-D-Mannose;GDP,37,9.3,-6.499324238,15966723
In phosphorous-containing anhydrides,P32056,3.6.1,Escherichia coli,2GT4,A,mutant Y127F,H2O + GDP-alpha-D-mannose = GDP + beta-D-Mannose,GDP-alpha-D-mannose,c1nc2c(=O)[nH]c(nc2n1[C@H]3[C@@H]([C@@H]([C@H](O3)COP(=O)(O)OP(=O)(O)O[C@@H]4[C@H]([C@H]([C@@H]([C@H](O4)CO)O)O)O)O)O)N,GDP;beta-D-Mannose,37,9.3,0.102050724,15966723
In phosphorous-containing anhydrides,P32056,3.6.1,Escherichia coli,1RYA,A,mutant D22A,H2O + GDP-alpha-D-Glucose = GDP + beta-D-Glucose,GDP-alpha-D-Glucose,,GDP;beta-D-Glucose,37,7.2,-7.499362612,15966723
In phosphorous-containing anhydrides,P32056,3.6.1,Escherichia coli,2GT4,A,mutant E64Q,H2O + GDP-alpha-D-mannose = GDP + beta-D-Mannose,GDP-alpha-D-mannose,c1nc2c(=O)[nH]c(nc2n1[C@H]3[C@@H]([C@@H]([C@H](O3)COP(=O)(O)OP(=O)(O)O[C@@H]4[C@H]([C@H]([C@@H]([C@H](O4)CO)O)O)O)O)O)N,GDP;beta-D-Mannose,37,9.3,0.029734474,12196023
In phosphorous-containing anhydrides,P32056,3.6.1,Escherichia coli,2GT4,A,mutant A69E,H2O + GDP-alpha-D-mannose = GDP + beta-D-Mannose,GDP-alpha-D-mannose,c1nc2c(=O)[nH]c(nc2n1[C@H]3[C@@H]([C@@H]([C@H](O3)COP(=O)(O)OP(=O)(O)O[C@@H]4[C@H]([C@H]([C@@H]([C@H](O4)CO)O)O)O)O)O)N,beta-D-Mannose;GDP,37,9.3,-2.398012012,12196023
In phosphorous-containing anhydrides,P32056,3.6.1,Escherichia coli,2GT4,A,mutant E60Q,H2O + GDP-alpha-D-mannose = GDP + beta-D-Mannose,GDP-alpha-D-mannose,c1nc2c(=O)[nH]c(nc2n1[C@H]3[C@@H]([C@@H]([C@H](O3)COP(=O)(O)OP(=O)(O)O[C@@H]4[C@H]([C@H]([C@@H]([C@H](O4)CO)O)O)O)O)O)N,GDP;beta-D-Mannose,37,9.3,-2.448939762,12196023
In phosphorous-containing anhydrides,P32056,3.6.1,Escherichia coli,2GT4,A,mutant E70Q,H2O + GDP-alpha-D-mannose = GDP + beta-D-Mannose,GDP-alpha-D-mannose,c1nc2c(=O)[nH]c(nc2n1[C@H]3[C@@H]([C@@H]([C@H](O3)COP(=O)(O)OP(=O)(O)O[C@@H]4[C@H]([C@H]([C@@H]([C@H](O4)CO)O)O)O)O)O)N,beta-D-Mannose;GDP,37,9.3,-7.279431518,12196023
In phosphorous-containing anhydrides,P32056,3.6.1,Escherichia coli,2GT4,A,mutant H88Q,H2O + GDP-alpha-D-mannose = GDP + beta-D-Mannose,GDP-alpha-D-mannose,c1nc2c(=O)[nH]c(nc2n1[C@H]3[C@@H]([C@@H]([C@H](O3)COP(=O)(O)OP(=O)(O)O[C@@H]4[C@H]([C@H]([C@@H]([C@H](O4)CO)O)O)O)O)O)N,GDP;beta-D-Mannose,37,9.3,-6.760793354,12196023
In phosphorous-containing anhydrides,P32056,3.6.1,Escherichia coli,2GT4,A,mutant H124Q,H2O + GDP-alpha-D-mannose = GDP + beta-D-Mannose,GDP-alpha-D-mannose,c1nc2c(=O)[nH]c(nc2n1[C@H]3[C@@H]([C@@H]([C@H](O3)COP(=O)(O)OP(=O)(O)O[C@@H]4[C@H]([C@H]([C@@H]([C@H](O4)CO)O)O)O)O)O)N,GDP;beta-D-Mannose,37,9.3,-9.279735739,12196023
In phosphorous-containing anhydrides,P32056,3.6.1,Escherichia coli,2GT4,A,mutant H102Q,H2O + GDP-alpha-D-mannose = GDP + beta-D-Mannose,GDP-alpha-D-mannose,c1nc2c(=O)[nH]c(nc2n1[C@H]3[C@@H]([C@@H]([C@H](O3)COP(=O)(O)OP(=O)(O)O[C@@H]4[C@H]([C@H]([C@@H]([C@H](O4)CO)O)O)O)O)O)N,beta-D-Mannose;GDP,37,9.3,-4.684274367,12196023
In phosphorous-containing anhydrides,P32056,3.6.1,Escherichia coli,2GT4,A,mutant H142Q,H2O + GDP-alpha-D-mannose = GDP + beta-D-Mannose,GDP-alpha-D-mannose,c1nc2c(=O)[nH]c(nc2n1[C@H]3[C@@H]([C@@H]([C@H](O3)COP(=O)(O)OP(=O)(O)O[C@@H]4[C@H]([C@H]([C@@H]([C@H](O4)CO)O)O)O)O)O)N,beta-D-Mannose;GDP,37,9.3,-1.345509541,12196023
In phosphorous-containing anhydrides,P32056,3.6.1,Escherichia coli,2GT4,A,mutant R52K,H2O + GDP-alpha-D-mannose = GDP + beta-D-Mannose,GDP-alpha-D-mannose,c1nc2c(=O)[nH]c(nc2n1[C@H]3[C@@H]([C@@H]([C@H](O3)COP(=O)(O)OP(=O)(O)O[C@@H]4[C@H]([C@H]([C@@H]([C@H](O4)CO)O)O)O)O)O)N,beta-D-Mannose;GDP,37,9.3,-6.24841252,12196023
In phosphorous-containing anhydrides,P32056,3.6.1,Escherichia coli,2GT4,A,mutant R65K,H2O + GDP-alpha-D-mannose = GDP + beta-D-Mannose,GDP-alpha-D-mannose,c1nc2c(=O)[nH]c(nc2n1[C@H]3[C@@H]([C@@H]([C@H](O3)COP(=O)(O)OP(=O)(O)O[C@@H]4[C@H]([C@H]([C@@H]([C@H](O4)CO)O)O)O)O)O)N,beta-D-Mannose;GDP,37,9.3,-3.706498552,12196023
In phosphorous-containing anhydrides,P32056,3.6.1,Escherichia coli,2GT4,A,mutant Y103F,H2O + GDP-alpha-D-mannose = GDP + beta-D-Mannose,GDP-alpha-D-mannose,c1nc2c(=O)[nH]c(nc2n1[C@H]3[C@@H]([C@@H]([C@H](O3)COP(=O)(O)OP(=O)(O)O[C@@H]4[C@H]([C@H]([C@@H]([C@H](O4)CO)O)O)O)O)O)N,GDP;beta-D-Mannose,37,9.3,-6.562914793,16981689
In phosphorous-containing anhydrides,P32056,3.6.1,Escherichia coli,2GT4,A,mutant R37Q,H2O + GDP-alpha-D-mannose = GDP + beta-D-Mannose,GDP-alpha-D-mannose,c1nc2c(=O)[nH]c(nc2n1[C@H]3[C@@H]([C@@H]([C@H](O3)COP(=O)(O)OP(=O)(O)O[C@@H]4[C@H]([C@H]([C@@H]([C@H](O4)CO)O)O)O)O)O)N,beta-D-Mannose;GDP,37,9.3,-5.316741634,15966723
In phosphorous-containing anhydrides,P32056,3.6.1,Escherichia coli,2GT4,A,mutant D22A,H2O + GDP-alpha-D-mannose = GDP + beta-D-Mannose,GDP-alpha-D-mannose,c1nc2c(=O)[nH]c(nc2n1[C@H]3[C@@H]([C@@H]([C@H](O3)COP(=O)(O)OP(=O)(O)O[C@@H]4[C@H]([C@H]([C@@H]([C@H](O4)CO)O)O)O)O)O)N,GDP;beta-D-Mannose,37,9.3,-6.30586969,15966723
insulysin,P35559,3.4.24.56,Rattus norvegicus,3P7L,A,mutant H112Q,"H2O + 2-Aminobenzoyl-GGFLRKHGQ-N-(2,4-dinitrophenyl)ethylenediamine = KHGQ-N-(2,4-dinitrophenyl)ethylenediamine + 2-Aminobenzoyl-GGFLR","2-Aminobenzoyl-GGFLRKHGQ-N-(2,4-dinitrophenyl)ethylenediamine",C1=CC(=C(C=C1[N+](=O)[O-])[N+](=O)[O-])NCCN,"2-Aminobenzoyl-GGFLR;KHGQ-N-(2,4-dinitrophenyl)ethylenediamine",-,7.3,-6.127501447,15749695
insulysin,P35559,3.4.24.56,Rattus norvegicus,3P7L,A,mutant E111A,"H2O + 2-Aminobenzoyl-GGFLRKHGQ-N-(2,4-dinitrophenyl)ethylenediamine = KHGQ-N-(2,4-dinitrophenyl)ethylenediamine + 2-Aminobenzoyl-GGFLR","2-Aminobenzoyl-GGFLRKHGQ-N-(2,4-dinitrophenyl)ethylenediamine",C1=CC(=C(C=C1[N+](=O)[O-])[N+](=O)[O-])NCCN,"2-Aminobenzoyl-GGFLR;KHGQ-N-(2,4-dinitrophenyl)ethylenediamine",-,7.3,-11.09794745,15749695
subtilisin,P35835,3.4.21.62,Bacillus subtilis,5GL8,A,mutant I11V,Succinyl-Ala-Ala-Pro-Phe-p-nitroanilide + H2O = Succinyl-Ala-Ala-Pro-Phe + 4-Nitroaniline,Succinyl-Ala-Ala-Pro-Phe-p-nitroanilide,C[C@@H](C(=O)N[C@@H](C)C(=O)N1CCC[C@H]1C(=O)N[C@@H](Cc2ccccc2)C(=O)Nc3ccc(cc3)[N+](=O)[O-])NC(=O)CCC(=O)O,4-Nitroaniline;Succinyl-Ala-Ala-Pro-Phe,25,8,-1.216906073,21074529
subtilisin,P35835,3.4.21.62,Bacillus subtilis,5GL8,A,mutant I30V,Succinyl-Ala-Ala-Pro-Phe-p-nitroanilide + H2O = Succinyl-Ala-Ala-Pro-Phe + 4-Nitroaniline,Succinyl-Ala-Ala-Pro-Phe-p-nitroanilide,C[C@@H](C(=O)N[C@@H](C)C(=O)N1CCC[C@H]1C(=O)N[C@@H](Cc2ccccc2)C(=O)Nc3ccc(cc3)[N+](=O)[O-])NC(=O)CCC(=O)O,4-Nitroaniline;Succinyl-Ala-Ala-Pro-Phe,25,8,-0.01955556,21074529
subtilisin,P35835,3.4.21.62,Bacillus subtilis,5GL8,A,mutant G34D,Succinyl-Ala-Ala-Pro-Phe-p-nitroanilide + H2O = Succinyl-Ala-Ala-Pro-Phe + 4-Nitroaniline,Succinyl-Ala-Ala-Pro-Phe-p-nitroanilide,C[C@@H](C(=O)N[C@@H](C)C(=O)N1CCC[C@H]1C(=O)N[C@@H](Cc2ccccc2)C(=O)Nc3ccc(cc3)[N+](=O)[O-])NC(=O)CCC(=O)O,4-Nitroaniline;Succinyl-Ala-Ala-Pro-Phe,25,8,-2.861840332,21074529
subtilisin,P35835,3.4.21.62,Bacillus subtilis,5GL8,A,mutant W106Y,Succinyl-Ala-Ala-Pro-Phe-p-nitroanilide + H2O = Succinyl-Ala-Ala-Pro-Phe + 4-Nitroaniline,Succinyl-Ala-Ala-Pro-Phe-p-nitroanilide,C[C@@H](C(=O)N[C@@H](C)C(=O)N1CCC[C@H]1C(=O)N[C@@H](Cc2ccccc2)C(=O)Nc3ccc(cc3)[N+](=O)[O-])NC(=O)CCC(=O)O,4-Nitroaniline;Succinyl-Ala-Ala-Pro-Phe,25,8,-0.915160772,21074529
subtilisin,P35835,3.4.21.62,Bacillus subtilis,5GL8,A,mutant W113Y,Succinyl-Ala-Ala-Pro-Phe-p-nitroanilide + H2O = Succinyl-Ala-Ala-Pro-Phe + 4-Nitroaniline,Succinyl-Ala-Ala-Pro-Phe-p-nitroanilide,C[C@@H](C(=O)N[C@@H](C)C(=O)N1CCC[C@H]1C(=O)N[C@@H](Cc2ccccc2)C(=O)Nc3ccc(cc3)[N+](=O)[O-])NC(=O)CCC(=O)O,4-Nitroaniline;Succinyl-Ala-Ala-Pro-Phe,25,8,-0.681130037,21074529
subtilisin,P35835,3.4.21.62,Bacillus subtilis,5GL8,A,mutant S33A,Succinyl-Ala-Ala-Pro-Phe-p-nitroanilide + H2O = Succinyl-Ala-Ala-Pro-Phe + 4-Nitroaniline,Succinyl-Ala-Ala-Pro-Phe-p-nitroanilide,C[C@@H](C(=O)N[C@@H](C)C(=O)N1CCC[C@H]1C(=O)N[C@@H](Cc2ccccc2)C(=O)Nc3ccc(cc3)[N+](=O)[O-])NC(=O)CCC(=O)O,4-Nitroaniline;Succinyl-Ala-Ala-Pro-Phe,25,8.6,-1.752222907,16411898
subtilisin,P35835,3.4.21.62,Bacillus subtilis,5GL8,A,mutant D60A,Succinyl-Ala-Ala-Pro-Phe-p-nitroanilide + H2O = Succinyl-Ala-Ala-Pro-Phe + 4-Nitroaniline,Succinyl-Ala-Ala-Pro-Phe-p-nitroanilide,C[C@@H](C(=O)N[C@@H](C)C(=O)N1CCC[C@H]1C(=O)N[C@@H](Cc2ccccc2)C(=O)Nc3ccc(cc3)[N+](=O)[O-])NC(=O)CCC(=O)O,4-Nitroaniline;Succinyl-Ala-Ala-Pro-Phe,25,8.6,-3.633918001,16411898
subtilisin,P35835,3.4.21.62,Bacillus subtilis,5GL8,A,mutant S62A,Succinyl-Ala-Ala-Pro-Phe-p-nitroanilide + H2O = Succinyl-Ala-Ala-Pro-Phe + 4-Nitroaniline,Succinyl-Ala-Ala-Pro-Phe-p-nitroanilide,C[C@@H](C(=O)N[C@@H](C)C(=O)N1CCC[C@H]1C(=O)N[C@@H](Cc2ccccc2)C(=O)Nc3ccc(cc3)[N+](=O)[O-])NC(=O)CCC(=O)O,Succinyl-Ala-Ala-Pro-Phe;4-Nitroaniline,25,8.6,-2.526753521,16411898
subtilisin,P35835,3.4.21.62,Bacillus subtilis,5GL8,A,mutant T220A,Succinyl-Ala-Ala-Pro-Phe-p-nitroanilide + H2O = Succinyl-Ala-Ala-Pro-Phe + 4-Nitroaniline,Succinyl-Ala-Ala-Pro-Phe-p-nitroanilide,C[C@@H](C(=O)N[C@@H](C)C(=O)N1CCC[C@H]1C(=O)N[C@@H](Cc2ccccc2)C(=O)Nc3ccc(cc3)[N+](=O)[O-])NC(=O)CCC(=O)O,Succinyl-Ala-Ala-Pro-Phe;4-Nitroaniline,25,8.6,-2.871673722,16411898
"xylan 1,4-beta-xylosidase",P36906,3.2.1.37,Thermoanaerobacter saccharolyticum,1UHV,A,mutant E160A,H2O + p-Nitrophenyl-beta-D-xylopyranoside = D-Xylose + p-Nitrophenol,p-Nitrophenyl-beta-D-xylopyranoside,,D-Xylose;p-Nitrophenol,37,6.5,-6.849126193,12146939
beta-lactamase,P37321,3.5.2.6,Pseudomonas aeruginosa,1E25,A,mutant T104E,H2O + Cephaloridine = Substituted beta-amino acid,Cephaloridine,[H]C34(C(NC(=O)Cc1cccs1)C(=O)N4(C(C(=O)O)=C(C[n+]2ccccc2)CS3)),Substituted beta-amino acid,30,7,0.02070719,9494118
beta-lactamase,P37321,3.5.2.6,Pseudomonas aeruginosa,1E25,A,mutant Q103AG,H2O + Ceftazidime = Substituted beta-amino acid,Ceftazidime,[H]C34(C(NC(=O)C(=NOC(C)(C)C(O)=O)c1csc(N)n1)C(=O)N4(C(C(=O)[O-])=C(C[n+]2ccccc2)CS3)),Substituted beta-amino acid,30,7,2.271771554,9494118
beta-lactamase,P37321,3.5.2.6,Pseudomonas aeruginosa,1E25,A,mutant N103BG,H2O + Ceftazidime = Substituted beta-amino acid,Ceftazidime,[H]C34(C(NC(=O)C(=NOC(C)(C)C(O)=O)c1csc(N)n1)C(=O)N4(C(C(=O)[O-])=C(C[n+]2ccccc2)CS3)),Substituted beta-amino acid,30,7,1.941255617,9494118
beta-lactamase,P37321,3.5.2.6,Pseudomonas aeruginosa,1E25,A,mutant A164S,H2O + Ceftazidime = Substituted beta-amino acid,Ceftazidime,[H]C34(C(NC(=O)C(=NOC(C)(C)C(O)=O)c1csc(N)n1)C(=O)N4(C(C(=O)[O-])=C(C[n+]2ccccc2)CS3)),Substituted beta-amino acid,30,7,2.128835774,9494118
beta-lactamase,P37321,3.5.2.6,Pseudomonas aeruginosa,1E25,A,mutant E166A,H2O + Ceftazidime = Substituted beta-amino acid,Ceftazidime,[H]C34(C(NC(=O)C(=NOC(C)(C)C(O)=O)c1csc(N)n1)C(=O)N4(C(C(=O)[O-])=C(C[n+]2ccccc2)CS3)),Substituted beta-amino acid,30,7,-0.096485714,9494118
beta-lactamase,P37321,3.5.2.6,Pseudomonas aeruginosa,1E25,A,mutant S238G,H2O + Ceftazidime = Substituted beta-amino acid,Ceftazidime,[H]C34(C(NC(=O)C(=NOC(C)(C)C(O)=O)c1csc(N)n1)C(=O)N4(C(C(=O)[O-])=C(C[n+]2ccccc2)CS3)),Substituted beta-amino acid,30,7,1.929990977,9494118
beta-lactamase,P37321,3.5.2.6,Pseudomonas aeruginosa,1E25,A,mutant G240CE,H2O + Ceftazidime = Substituted beta-amino acid,Ceftazidime,[H]C34(C(NC(=O)C(=NOC(C)(C)C(O)=O)c1csc(N)n1)C(=O)N4(C(C(=O)[O-])=C(C[n+]2ccccc2)CS3)),Substituted beta-amino acid,30,7,1.422167737,9494118
beta-glucosidase,P49235,3.2.1.21,Zea mays,1HXJ,A,mutant E186D,H2O + 4-MethylMbelliferyl-beta-D-glucoside = beta-D-Glucose + 4-MethylMbelliferone,4-Methylumbelliferyl-beta-D-glucoside,CC1=CC(=O)OC2=C1C=CC(=C2)OC3[C@@H]([C@H]([C@@H]([C@H](O3)CO)O)O)O,4-MethylMbelliferone;beta-D-Glucose,25,5.5,-9.181351127,11706179
beta-glucosidase,P49235,3.2.1.21,Zea mays,1HXJ,A,mutant E401Q,H2O + 4-MethylMbelliferyl-beta-D-glucoside = beta-D-Glucose + 4-MethylMbelliferone,4-Methylumbelliferyl-beta-D-glucoside,CC1=CC(=O)OC2=C1C=CC(=C2)OC3[C@@H]([C@H]([C@@H]([C@H](O3)CO)O)O)O,beta-D-Glucose;4-MethylMbelliferone,25,5.5,-10.78894192,11706179
beta-glucosidase,P49235,3.2.1.21,Zea mays,1HXJ,A,mutant V199L,p-Nitrophenyl-beta-D-glucoside + H2O = p-Nitrophenol + beta-D-Glucose,p-Nitrophenyl-beta-D-glucoside,,p-Nitrophenol;beta-D-Glucose,37,5.8,0.687626887,12684498
beta-glucosidase,P49235,3.2.1.21,Zea mays,1HXJ,A,mutant D256N,p-Nitrophenyl-beta-D-glucoside + H2O = p-Nitrophenol + beta-D-Glucose,p-Nitrophenyl-beta-D-glucoside,,p-Nitrophenol;beta-D-Glucose,37,5.8,-2.12189705,12684498
beta-glucosidase,P49235,3.2.1.21,Zea mays,1HXJ,A,mutant M258F,p-Nitrophenyl-beta-D-glucoside + H2O = p-Nitrophenol + beta-D-Glucose,p-Nitrophenyl-beta-D-glucoside,,beta-D-Glucose;p-Nitrophenol,37,5.8,-0.532134128,12684498
beta-glucosidase,P49235,3.2.1.21,Zea mays,1HXJ,A,mutant F461S,p-Nitrophenyl-beta-D-glucoside + H2O = p-Nitrophenol + beta-D-Glucose,p-Nitrophenyl-beta-D-glucoside,,beta-D-Glucose;p-Nitrophenol,37,5.8,0.80447365,12684498
beta-glucosidase,P49235,3.2.1.21,Zea mays,1HXJ,A,mutant Y468F,p-Nitrophenyl-beta-D-glucoside + H2O = p-Nitrophenol + beta-D-Glucose,p-Nitrophenyl-beta-D-glucoside,,p-Nitrophenol;beta-D-Glucose,37,5.8,1.228748092,12684498
beta-glucosidase,P49235,3.2.1.21,Zea mays,1HXJ,A,mutant F193V,H2O + 4-MethylMbelliferyl-beta-D-glucoside = beta-D-Glucose + 4-MethylMbelliferone,4-Methylumbelliferyl-beta-D-glucoside,CC1=CC(=O)OC2=C1C=CC(=C2)OC3[C@@H]([C@H]([C@@H]([C@H](O3)CO)O)O)O,4-MethylMbelliferone;beta-D-Glucose,37,5.8,-1.711948565,12684498
beta-glucosidase,P49235,3.2.1.21,Zea mays,1HXJ,A,mutant V199L,H2O + 4-MethylMbelliferyl-beta-D-glucoside = beta-D-Glucose + 4-MethylMbelliferone,4-Methylumbelliferyl-beta-D-glucoside,CC1=CC(=O)OC2=C1C=CC(=C2)OC3[C@@H]([C@H]([C@@H]([C@H](O3)CO)O)O)O,beta-D-Glucose;4-MethylMbelliferone,37,5.8,0.058614881,12684498
beta-glucosidase,P49235,3.2.1.21,Zea mays,1HXJ,A,mutant P372A,H2O + 4-MethylMbelliferyl-beta-D-glucoside = beta-D-Glucose + 4-MethylMbelliferone,4-Methylumbelliferyl-beta-D-glucoside,CC1=CC(=O)OC2=C1C=CC(=C2)OC3[C@@H]([C@H]([C@@H]([C@H](O3)CO)O)O)O,4-MethylMbelliferone;beta-D-Glucose,37,5.8,0.248560363,12684498
bis(5'-adenosyl)-triphosphatase,P49789,3.6.1.29,Homo sapiens,4FIT,A,mutant H96G,"H2O + P1,P3-Bis(5'-adenosyl) triphosphate = ADP + AMP","P1,P3-Bis(5'-adenosyl)-triphosphate",Nc6ncnc1c6(ncn1C5OC(COP(O)(=O)OP(O)(=O)OP(O)(=O)OCC2OC(C(O)C2(O))n4cnc3c(N)ncnc34)C(O)C5(O)),AMP;ADP,26.5,8.9,-12.19691471,15182206
beta-lactamase,P52700,3.5.2.6,Stenotrophomonas maltophilia,1SML,A,mutant W167F,H2O + Nitrocefin = Substituted beta-amino acid,Nitrocefin,c1cc(sc1)CC(=O)N[C@H]2[C@@H]3N(C2=O)C(=C(CS3)/C=C/c4ccc(cc4[N+](=O)[O-])[N+](=O)[O-])C(=O)O,Substituted beta-amino acid,25,7,-0.09531018,15271998
beta-lactamase,P52700,3.5.2.6,Stenotrophomonas maltophilia,1SML,A,mutant W169F,H2O + Nitrocefin = Substituted beta-amino acid,Nitrocefin,c1cc(sc1)CC(=O)N[C@H]2[C@@H]3N(C2=O)C(=C(CS3)/C=C/c4ccc(cc4[N+](=O)[O-])[N+](=O)[O-])C(=O)O,Substituted beta-amino acid,25,7,-0.105360516,15271998
beta-lactamase,P52700,3.5.2.6,Stenotrophomonas maltophilia,1SML,A,mutant D88C,H2O + Biapenem = Substituted beta-amino acid,Biapenem,[H]C2(C(C)O)(C(=O)N1C(C(=O)[O-])=C(C(C)C12([H]))SC3Cn4cnc[n+]4(C3)),Substituted beta-amino acid,25,7,-6.442739141,14573595
beta-lactamase,P52700,3.5.2.6,Stenotrophomonas maltophilia,1SML,A,mutant S185A,H2O + Nitrocefin = Substituted beta-amino acid,Nitrocefin,c1cc(sc1)CC(=O)N[C@H]2[C@@H]3N(C2=O)C(=C(CS3)/C=C/c4ccc(cc4[N+](=O)[O-])[N+](=O)[O-])C(=O)O,Substituted beta-amino acid,25,7,-0.401986844,11876827
beta-lactamase,P52700,3.5.2.6,Stenotrophomonas maltophilia,1SML,A,mutant Y191A,H2O + Nitrocefin = Substituted beta-amino acid,Nitrocefin,c1cc(sc1)CC(=O)N[C@H]2[C@@H]3N(C2=O)C(=C(CS3)/C=C/c4ccc(cc4[N+](=O)[O-])[N+](=O)[O-])C(=O)O,Substituted beta-amino acid,25,7,-1.186105802,11876827
beta-lactamase,P52700,3.5.2.6,Stenotrophomonas maltophilia,1SML,A,mutant N196L,H2O + Cefoxitin = Substituted beta-amino acid,Cefoxitin,,Substituted beta-amino acid,25,7,-2.133508761,11876827
pancreatic ribonuclease,P61823,4.6.1.18,Bos taurus,6ETK,A,mutant F46L,"H2O + 2',3'-Cyclic CMP = Cytidine 3'-phosphate","2',3'-Cyclic CMP",NC=1C=CN(C(=O)N=1)C3OC(CO)C2OP(O)(=O)OC23,Cytidine 3'-phosphate,25,5.5,-0.104087755,12962489
beta-lactamase,P62593,3.5.2.6,Escherichia coli,1BTL,A,mutant W165S,H2O + Ampicillin = Substituted beta-amino acid,Ampicillin,,Substituted beta-amino acid,30,7,-1.390348631,9360991
beta-lactamase,P62593,3.5.2.6,Escherichia coli,1BTL,A,mutant A237T,H2O + Cephalothin = Substituted beta-amino acid,Cephalothin,[H]C23(C(NC(=O)Cc1cccs1)C(=O)N3(C(C(O)=O)=C(COC(C)=O)CS2)),Substituted beta-amino acid,30,7,1.091320569,9360991
beta-lactamase,P62593,3.5.2.6,Escherichia coli,1BTL,A,mutant E240C,H2O + Cephalothin = Substituted beta-amino acid,Cephalothin,[H]C23(C(NC(=O)Cc1cccs1)C(=O)N3(C(C(O)=O)=C(COC(C)=O)CS2)),Substituted beta-amino acid,30,7,0.380473812,9360991
beta-lactamase,P62593,3.5.2.6,Escherichia coli,1BTL,A,mutant N132D,Penicillin G + H2O = Substituted beta-amino acid,Penicillin G,,Substituted beta-amino acid,30,5.5,-1.157005261,7822310
beta-lactamase,P62593,3.5.2.6,Escherichia coli,1BTL,A,mutant D179N,H2O + Cefotaxime = Substituted beta-amino acid,Cefotaxime,[H]C34(C(NC(=O)C(=NOC(C)(C)C(O)=O)c1csc(N)n1)C(=O)N4(C(C(=O)[O-])=C(C[n+]2ccccc2)CS3)),Substituted beta-amino acid,22,7,0.01331989,10438473
beta-lactamase,P62593,3.5.2.6,Escherichia coli,1BTL,A,mutant R164S,H2O + Cefotaxime = Substituted beta-amino acid,Cefotaxime,[H]C34(C(NC(=O)C(=NOC(C)(C)C(O)=O)c1csc(N)n1)C(=O)N4(C(C(=O)[O-])=C(C[n+]2ccccc2)CS3)),Substituted beta-amino acid,22,7,0.384383886,10438473
beta-lactamase,P62593,3.5.2.6,Escherichia coli,1BTL,A,mutant Y105W,Penicillin G + H2O = Substituted beta-amino acid,Benzylpenicillin,,Substituted beta-amino acid,22,7,0.305234005,15326193
Phosphoric diester hydrolases,P70158,3.1.4,Mus musculus,5FC1,A,mutant Y257A,ATP + H2O = Phosphate + ADP,ATP,Nc3ncnc1c3(ncn1C2OC(COP(O)(=O)OP(O)(=O)OP(O)(O)=O)C(O)C2(O)),ADP;Phosphate,37,5,-0.50619418,26792860
Phosphoric diester hydrolases,P70158,3.1.4,Mus musculus,5FC1,A,mutant H149A,ATP + H2O = Phosphate + ADP,ATP,Nc3ncnc1c3(ncn1C2OC(COP(O)(=O)OP(O)(=O)OP(O)(O)=O)C(O)C2(O)),ADP;Phosphate,37,5,-9.667877288,26792860
Phosphoric diester hydrolases,P70158,3.1.4,Mus musculus,5FC1,A,mutant H111A,ATP + H2O = Phosphate + ADP,ATP,Nc3ncnc1c3(ncn1C2OC(COP(O)(=O)OP(O)(=O)OP(O)(O)=O)C(O)C2(O)),ADP;Phosphate,37,5,-8.675600649,26792860
"arabinan endo-1,5-alpha-L-arabinanase",P94522,3.2.1.99,Bacillus subtilis,1UV4,A,mutant H13A,H2O + Arabinotetraose = Arabinose + Arabinotriose,Arabinotetraose,,Arabinose;Arabinotriose,27,7,-3.213145129,15708971
"arabinan endo-1,5-alpha-L-arabinanase",P94522,3.2.1.99,Bacillus subtilis,1UV4,A,mutant F94A,H2O + Arabinotetraose = Arabinose + Arabinotriose,Arabinotetraose,,Arabinose;Arabinotriose,27,7,-3.136184108,15708971
"arabinan endo-1,5-alpha-L-arabinanase",P94522,3.2.1.99,Bacillus subtilis,1UV4,A,mutant F151A,H2O + Arabinotetraose = Arabinose + Arabinotriose,Arabinotetraose,,Arabinose;Arabinotriose,27,7,-2.4918271,15708971
"arabinan endo-1,5-alpha-L-arabinanase",P94522,3.2.1.99,Bacillus subtilis,1UV4,A,mutant W152A,H2O + Arabinotetraose = Arabinose + Arabinotriose,Arabinotetraose,,Arabinose;Arabinotriose,27,7,-2.787060767,15708971
protein-tyrosine-phosphatase,Q00684,3.1.3.48,Saccharomyces cerevisiae,5XW4,A,mutant D50N,H2O + 4-Nitrophenyl phosphate = Phosphate + p-Nitrophenol,4-Nitrophenyl phosphate,,p-Nitrophenol;Phosphate,30,7,-0.193044809,15128740
protein-tyrosine-phosphatase,Q00684,3.1.3.48,Saccharomyces cerevisiae,5XW4,A,mutant D129N,H2O + 4-Nitrophenyl phosphate = Phosphate + p-Nitrophenol,4-Nitrophenyl phosphate,,p-Nitrophenol;Phosphate,30,7,-1.044183369,15128740
protein-tyrosine-phosphatase,Q00684,3.1.3.48,Saccharomyces cerevisiae,5XW4,A,mutant E168Q,H2O + 4-Nitrophenyl phosphate = Phosphate + p-Nitrophenol,4-Nitrophenyl phosphate,,p-Nitrophenol;Phosphate,30,7,-0.152887721,15128740
protein-tyrosine-phosphatase,Q00684,3.1.3.48,Saccharomyces cerevisiae,5XW4,A,mutant E171Q,H2O + 4-Nitrophenyl phosphate = Phosphate + p-Nitrophenol,4-Nitrophenyl phosphate,,Phosphate;p-Nitrophenol,30,7,-0.234718357,15128740
protein-tyrosine-phosphatase,Q00684,3.1.3.48,Saccharomyces cerevisiae,5XW4,A,mutant D177N,H2O + 4-Nitrophenyl phosphate = Phosphate + p-Nitrophenol,4-Nitrophenyl phosphate,,p-Nitrophenol;Phosphate,30,7,0.705954426,15128740
protein-tyrosine-phosphatase,Q00684,3.1.3.48,Saccharomyces cerevisiae,5XW4,A,mutant E308Q,H2O + 4-Nitrophenyl phosphate = Phosphate + p-Nitrophenol,4-Nitrophenyl phosphate,,p-Nitrophenol;Phosphate,30,7,-0.181731899,15128740
protein-tyrosine-phosphatase,Q00684,3.1.3.48,Saccharomyces cerevisiae,5XW4,A,mutant D143N,"H2O + 6,8-Difluoro-4-methylMbelliferyl phosphate = Phosphate + 6,8-Difluoro-4-methylMbelliferone","6,8-Difluoro-4-methylumbelliferyl phosphate",C1(=C(C(=CC2=C1OC(C=C2C)=O)F)OP(O)(O)=O)F,"Phosphate;6,8-Difluoro-4-methylMbelliferone",30,7,0.137621379,15128740
protein-tyrosine-phosphatase,Q00684,3.1.3.48,Saccharomyces cerevisiae,5XW4,A,mutant E174Q,"H2O + 6,8-Difluoro-4-methylMbelliferyl phosphate = Phosphate + 6,8-Difluoro-4-methylMbelliferone","6,8-Difluoro-4-methylumbelliferyl phosphate",C1(=C(C(=CC2=C1OC(C=C2C)=O)F)OP(O)(O)=O)F,"6,8-Difluoro-4-methylMbelliferone;Phosphate",30,7,0.101882252,15128740
protein-tyrosine-phosphatase,Q00684,3.1.3.48,Saccharomyces cerevisiae,5XW4,A,mutant D253A,"H2O + 6,8-Difluoro-4-methylMbelliferyl phosphate = Phosphate + 6,8-Difluoro-4-methylMbelliferone","6,8-Difluoro-4-methylumbelliferyl phosphate",C1(=C(C(=CC2=C1OC(C=C2C)=O)F)OP(O)(O)=O)F,"6,8-Difluoro-4-methylMbelliferone;Phosphate",30,7,0.138558585,15128740
bacterial leucyl aminopeptidase,Q01693,3.4.11.10,Vibrio proteolyticus,2DEA,A,mutant E151Q,H2O + L-Leucinyl-p-nitroanilide = L-Leucine + 4-Nitroaniline,L-Leucine-p-nitroanilide,,L-Leucine;4-Nitroaniline,25,8,-10.46788688,15138277
RNA helicase,Q03532,3.6.4.13,Saccharomyces cerevisiae,5Z3G,Y,mutant K389A,ATP + H2O = Phosphate + ADP,ATP,Nc3ncnc1c3(ncn1C2OC(COP(O)(=O)OP(O)(=O)OP(O)(O)=O)C(O)C2(O)),Phosphate;ADP,30,6.5,1.124344345,15718299
RNA helicase,Q03532,3.6.4.13,Saccharomyces cerevisiae,5Z3G,Y,mutant S228A,ATP + H2O = Phosphate + ADP,ATP,Nc3ncnc1c3(ncn1C2OC(COP(O)(=O)OP(O)(=O)OP(O)(O)=O)C(O)C2(O)),Phosphate;ADP,30,6.5,-0.898339451,15718299
RNA helicase,Q03532,3.6.4.13,Saccharomyces cerevisiae,5Z3G,Y,mutant T230A,ATP + H2O = Phosphate + ADP,ATP,Nc3ncnc1c3(ncn1C2OC(COP(O)(=O)OP(O)(=O)OP(O)(O)=O)C(O)C2(O)),Phosphate;ADP,30,6.5,-0.936264485,15718299
RNA helicase,Q03532,3.6.4.13,Saccharomyces cerevisiae,5Z3G,Y,mutant H375E,ATP + H2O = Phosphate + ADP,ATP,Nc3ncnc1c3(ncn1C2OC(COP(O)(=O)OP(O)(=O)OP(O)(O)=O)C(O)C2(O)),Phosphate;ADP,30,6.5,-0.988739735,15718299
hydroxyacylglutathione hydrolase,Q16775,3.1.2.6,Homo sapiens,1QH3,A,mutant Y175F,H2O + (R)-S-Lactoylglutathione = Reduced glutathione + D-Lactate,(R)-S-Lactoylglutathione,CC(O)C(=O)SCC(NC(=O)CCC(N)C(O)=O)C(=O)NCC(O)=O,Reduced glutathione;D-Lactate,37,7.1,-2.504324736,11018726
beta-glucosidase,Q25BW5,3.2.1.21,Phanerochaete chrysosporium,2E3Z,A,mutant V173C,Cellobiose + H2O = beta-D-Glucose,Cellobiose,,beta-D-Glucose,30,6,0.206010356,18023045
beta-glucosidase,Q25BW5,3.2.1.21,Phanerochaete chrysosporium,2E3Z,A,mutant M177L,Cellobiose + H2O = beta-D-Glucose,Cellobiose,,beta-D-Glucose,30,6,0.030440085,18023045
beta-glucosidase,Q25BW5,3.2.1.21,Phanerochaete chrysosporium,2E3Z,A,mutant D229N,Cellobiose + H2O = beta-D-Glucose,Cellobiose,,beta-D-Glucose,30,5,-2.241295939,18023045
beta-glucosidase,Q25BW5,3.2.1.21,Phanerochaete chrysosporium,2E3Z,A,mutant H231D,Cellobiose + H2O = beta-D-Glucose,Cellobiose,,beta-D-Glucose,30,6.5,-0.349744433,18023045
beta-glucosidase,Q25BW5,3.2.1.21,Phanerochaete chrysosporium,2E3Z,A,mutant K253A,Cellobiose + H2O = beta-D-Glucose,Cellobiose,,beta-D-Glucose,30,6.5,-1.018768428,18023045
acid phosphatase,Q540U1,3.1.3.2,Salmonella typhimurium,1Z5G,A,mutant K154N,H2O + 4-Nitrophenyl phosphate = Phosphate + p-Nitrophenol,4-Nitrophenyl phosphate,,p-Nitrophenol;Phosphate,37,5.6,-5.456270265,17570338
acid phosphatase,Q540U1,3.1.3.2,Salmonella typhimurium,1Z5G,A,mutant D173N,H2O + 4-Nitrophenyl phosphate = Phosphate + p-Nitrophenol,4-Nitrophenyl phosphate,,p-Nitrophenol;Phosphate,37,5.6,-4.532599592,17570338
beta-glucosidase,Q75I93,3.2.1.21,Oryza sativa,2RGL,A,mutant I179V,Cellobiose + H2O = beta-D-Glucose,Cellobiose,,beta-D-Glucose,30,5,0.060736235,18308333
beta-glucosidase,Q75I93,3.2.1.21,Oryza sativa,2RGL,A,mutant N245V,Cellobiose + H2O = beta-D-Glucose,Cellobiose,,beta-D-Glucose,30,5,0.603890746,18308333
beta-glucosidase,Q75I93,3.2.1.21,Oryza sativa,2RGL,A,mutant L442R,Cellotriose + H2O = Cellobiose + D-Glucose,Cellotriose,OCC3OC(OC1C(O)C(O)C(OC1(CO))OC2C(O)C(O)C(O)OC2(CO))C(O)C(O)C3(O),Cellobiose;D-Glucose,30,5,0.048922298,18308333
beta-glucosidase,Q75I93,3.2.1.21,Oryza sativa,2RGL,A,mutant N190H,Cellotriose + H2O = Cellobiose + D-Glucose,Cellotriose,OCC3OC(OC1C(O)C(O)C(OC1(CO))OC2C(O)C(O)C(O)OC2(CO))C(O)C(O)C3(O),Cellobiose;D-Glucose,30,5,0.579180011,18308333
alpha-galactosidase,Q8A6L0,3.2.1.22,Bacteroides thetaiotaomicron,3A24,A,mutant D415N,p-Nitrophenyl-alpha-D-galactoside + H2O = p-Nitrophenol + alpha-D-Galactose,p-Nitrophenyl-alpha-D-galactoside,,p-Nitrophenol;alpha-D-Galactose,35,6,-11.13375945,19646996
alpha-galactosidase,Q8A6L0,3.2.1.22,Bacteroides thetaiotaomicron,3A24,A,mutant E470Q,p-Nitrophenyl-alpha-D-galactoside + H2O = p-Nitrophenol + alpha-D-Galactose,p-Nitrophenyl-alpha-D-galactoside,,p-Nitrophenol;alpha-D-Galactose,35,6,-8.211299378,19646996
thiamine-triphosphatase,Q8JZL3,3.6.1.28,Mus musculus,5A64 ,A,mutant E81A,H2O + Thiamine triphosphate = Thiamine diphosphate + Phosphate,Thiamine triphosphate,,Thiamine diphosphate;Phosphate,37,8.3,-0.974827234,23707715
thiamine-triphosphatase,Q8JZL3,3.6.1.28,Mus musculus,5A64 ,A,mutant K11A,H2O + Thiamine triphosphate = Thiamine diphosphate + Phosphate,Thiamine triphosphate,,Phosphate;Thiamine diphosphate,37,8.3,-1.749199855,23707715
thiamine-triphosphatase,Q8JZL3,3.6.1.28,Mus musculus,5A64 ,A,mutant Y79A,H2O + Thiamine triphosphate = Thiamine diphosphate + Phosphate,Thiamine triphosphate,,Thiamine diphosphate;Phosphate,37,8.3,-3.001962822,23707715
thiamine-triphosphatase,Q8JZL3,3.6.1.28,Mus musculus,5A64 ,A,mutant D37A,H2O + Thiamine triphosphate = Thiamine diphosphate + Phosphate,Thiamine triphosphate,,Phosphate;Thiamine diphosphate,37,8.3,-5.324750624,23707715
thiamine-triphosphatase,Q8JZL3,3.6.1.28,Mus musculus,5A64 ,A,mutant W53A,H2O + Thiamine triphosphate = Thiamine diphosphate + Phosphate,Thiamine triphosphate,,Thiamine diphosphate;Phosphate,37,8.3,-5.884366412,23707715
thiamine-triphosphatase,Q8JZL3,3.6.1.28,Mus musculus,5A64 ,A,mutant K65A,H2O + Thiamine triphosphate = Thiamine diphosphate + Phosphate,Thiamine triphosphate,,Thiamine diphosphate;Phosphate,37,8.3,-7.216593604,23707715
thiamine-triphosphatase,Q8JZL3,3.6.1.28,Mus musculus,5A64 ,A,mutant K193A,H2O + Thiamine triphosphate = Thiamine diphosphate + Phosphate,Thiamine triphosphate,,Thiamine diphosphate;Phosphate,37,8.3,-7.257237766,23707715
thiamine-triphosphatase,Q8JZL3,3.6.1.28,Mus musculus,5A64 ,A,mutant Y39A,H2O + Thiamine triphosphate = Thiamine diphosphate + Phosphate,Thiamine triphosphate,,Phosphate;Thiamine diphosphate,37,8.3,-7.932059317,23707715
thiamine-triphosphatase,Q8JZL3,3.6.1.28,Mus musculus,5A64 ,A,mutant D147A,H2O + Thiamine triphosphate = Thiamine diphosphate + Phosphate,Thiamine triphosphate,,Phosphate;Thiamine diphosphate,37,8.3,-8.037916387,23707715
6-oxocamphor hydrolase,Q93TU6,3.7.1.18,Rhodococcus sp.,1O8U,A,mutant H45A,H2O + 6-Oxocamphor = alpha-Campholinic acid,6-Oxocamphor,,alpha-Campholinic acid,25,7,-4.948604348,15138275
6-oxocamphor hydrolase,Q93TU6,3.7.1.18,Rhodococcus sp.,1O8U,A,mutant H122A,H2O + 6-Oxocamphor = alpha-Campholinic acid,6-Oxocamphor,,alpha-Campholinic acid,25,7,-9.097016131,15138275
6-oxocamphor hydrolase,Q93TU6,3.7.1.18,Rhodococcus sp.,1O8U,A,mutant H145A,H2O + 6-Oxocamphor = alpha-Campholinic acid,6-Oxocamphor,,alpha-Campholinic acid,25,7,-12.16055151,15138275
6-oxocamphor hydrolase,Q93TU6,3.7.1.18,Rhodococcus sp.,1O8U,A,mutant D154N,H2O + 6-Oxocamphor = alpha-Campholinic acid,6-Oxocamphor,,alpha-Campholinic acid,25,7,-10.72293636,15138275
6-oxocamphor hydrolase,Q93TU6,3.7.1.18,Rhodococcus sp.,1O8U,A,mutant E244Q,H2O + 6-Oxocamphor = alpha-Campholinic acid,6-Oxocamphor,,alpha-Campholinic acid,25,7,-4.143539251,15138275
"glucan 1,6-alpha-glucosidase",Q99040,3.2.1.70,Streptococcus mutans,2ZIC,A,mutant W238A,H2O + Isomaltose = alpha-D-Glucose,Isomaltose,OCC2OC(OCC1OC(O)C(O)C(O)C1(O))C(O)C(O)C2(O),alpha-D-Glucose,37,6,-3.163691065,16503208
beta-glucosidase,Q9FYS3,3.2.1.182,Secale cereale,3AIU,A,mutant F198A,H2O + DIBOA glucoside = beta-D-Glucose + DIBOA,DIBOA glucoside,,beta-D-Glucose;DIBOA,30,5.5,-3.32924945,16751439
beta-glucosidase,Q9FYS3,3.2.1.182,Secale cereale,3AIU,A,mutant Y378A,H2O + DIBOA glucoside = beta-D-Glucose + DIBOA,DIBOA glucoside,,beta-D-Glucose;DIBOA,30,5.5,-0.070773315,16751439
beta-glucosidase,Q9FYS3,3.2.1.182,Secale cereale,3AIV,A,mutant F198A,H2O + DIMBOA glucoside = beta-D-Glucose + DIMBOA,DIMBOA glucoside,COc1ccc3c(c1)OC(OC2OC(CO)C(O)C(O)C2(O))C(=O)N3(O),DIMBOA;beta-D-Glucose,30,5.5,-3.203597085,16751439
beta-glucosidase,Q9FYS3,3.2.1.182,Secale cereale,3AIV,A,mutant Y378A,H2O + DIMBOA glucoside = beta-D-Glucose + DIMBOA,DIMBOA glucoside,COc1ccc3c(c1)OC(OC2OC(CO)C(O)C(O)C2(O))C(=O)N3(O),beta-D-Glucose;DIMBOA,30,5.5,1.56570713,16751439
beta-glucosidase,Q9FYS3,3.2.1.182,Secale cereale,3AIV,A,mutant G464S,H2O + DIMBOA glucoside = beta-D-Glucose + DIMBOA,DIMBOA glucoside,COc1ccc3c(c1)OC(OC2OC(CO)C(O)C(O)C2(O))C(=O)N3(O),beta-D-Glucose;DIMBOA,30,5.5,0.695366634,16751439
beta-glucosidase,Q9FYS3,3.2.1.182,Secale cereale,3AIV,A,mutant S465L,H2O + DIMBOA glucoside = beta-D-Glucose + DIMBOA,DIMBOA glucoside,COc1ccc3c(c1)OC(OC2OC(CO)C(O)C(O)C2(O))C(=O)N3(O),DIMBOA;beta-D-Glucose,30,5.5,0.890306477,16751439
beta-glucosidase,Q9FYS3,3.2.1.21,Secale cereale,3AIU,A,mutant G464F,p-Nitrophenyl-beta-D-glucoside + H2O = p-Nitrophenol + beta-D-Glucose,p-Nitrophenyl-beta-D-glucoside,,beta-D-Glucose;p-Nitrophenol,30,5.5,0.184571286,16751439
beta-glucosidase,Q9FYS3,3.2.1.21,Secale cereale,3AIU,A,mutant S465L,p-Nitrophenyl-beta-D-glucoside + H2O = p-Nitrophenol + beta-D-Glucose,p-Nitrophenyl-beta-D-glucoside,,p-Nitrophenol;beta-D-Glucose,30,5.5,1.093941566,16751439
beta-glucosidase,Q9FYS3,3.2.1.21,Secale cereale,3AIU,A,mutant F471Y,p-Nitrophenyl-beta-D-glucoside + H2O = p-Nitrophenol + beta-D-Glucose,p-Nitrophenyl-beta-D-glucoside,,p-Nitrophenol;beta-D-Glucose,30,5.5,1.395044655,16751439
beta-glucosidase,Q9H227,3.2.1.21,Homo sapiens,2JFE,X,mutant Q307N,H2O + p-Nitrophenyl-beta-D-fucopyranoside = beta-D-Fucose + p-Nitrophenol,p-Nitrophenyl-beta-D-fucopyranoside,C[C@@H]1[C@@H]([C@@H]([C@H]([C@@H](O1)OC2=CC=C(C=C2)[N+](=O)[O-])O)O)O,beta-D-Fucose;p-Nitrophenol,37,6.5,-1.794959536,17555766
beta-glucosidase,Q9H227,3.2.1.21,Homo sapiens,2JFE,X,mutant M172L,H2O + 4-Nitrophenyl-alpha-L-arabinopyranoside = alpha-L-Arabinose + p-Nitrophenol,4-Nitrophenyl-alpha-L-arabinopyranoside,C1[C@@H]([C@@H]([C@H]([C@@H](O1)OC2=CC=C(C=C2)[N+](=O)[O-])O)O)O,p-Nitrophenol;alpha-L-Arabinose,37,6.5,0.516395155,17555766
beta-glucosidase,Q9H227,3.2.1.21,Homo sapiens,2JFE,X,mutant W345A,p-Nitrophenyl-beta-D-glucoside + H2O = p-Nitrophenol + beta-D-Glucose,p-Nitrophenyl-beta-D-glucoside,,p-Nitrophenol;beta-D-Glucose,37,6.5,-5.101149263,17555766
beta-glucosidase,Q9H227,3.2.1.21,Homo sapiens,2JFE,X,mutant Y308F,H2O + p-Nitrophenyl-beta-D-galactoside = beta-D-Galactose + p-Nitrophenol,4-Nitrophenyl-beta-D-galactopyranoside,,p-Nitrophenol;beta-D-Galactose,37,6.5,-8.644503449,12667141
beta-glucosidase,Q9H227,3.2.1.21,Homo sapiens,2JFE,X,mutant V168Y,H2O + p-Nitrophenyl-beta-D-galactoside = beta-D-Galactose + p-Nitrophenol,4-Nitrophenyl-beta-D-galactopyranoside,,beta-D-Galactose;p-Nitrophenol,37,6.5,-8.84042058,12667141
acyl-CoA hydrolase,Q9NPJ3,3.1.2.20,Homo sapiens,3F5O,A,mutant D65N,H2O + 3-Hydroxyphenylacetyl-CoA = Coenzyme A + 3-Hydroxyphenylacetate,3-Hydroxyphenylacetyl-CoA,,Coenzyme A;3-Hydroxyphenylacetate,25,7.5,-3.530655435,19170545
acyl-CoA hydrolase,Q9NPJ3,3.1.2.20,Homo sapiens,3F5O,A,mutant H56A,H2O + 3-Hydroxyphenylacetyl-CoA = Coenzyme A + 3-Hydroxyphenylacetate,3-Hydroxyphenylacetyl-CoA,,Coenzyme A;3-Hydroxyphenylacetate,25,7.5,-0.359032489,19170545
acyl-CoA hydrolase,Q9NPJ3,3.1.2.20,Homo sapiens,3F5O,A,mutant S83A,H2O + 3-Hydroxyphenylacetyl-CoA = Coenzyme A + 3-Hydroxyphenylacetate,3-Hydroxyphenylacetyl-CoA,,Coenzyme A;3-Hydroxyphenylacetate,25,7.5,-4.256592372,19170545
acyl-CoA hydrolase,Q9NPJ3,3.1.2.20,Homo sapiens,3F5O,A,mutant T69A,H2O + 3-Hydroxyphenylacetyl-CoA = Coenzyme A + 3-Hydroxyphenylacetate,3-Hydroxyphenylacetyl-CoA,,Coenzyme A;3-Hydroxyphenylacetate,25,7.5,-2.113589416,19170545
acyl-CoA hydrolase,Q9NPJ3,3.1.2.20,Homo sapiens,3F5O,A,mutant H134A,H2O + 3-Hydroxyphenylacetyl-CoA = Coenzyme A + 3-Hydroxyphenylacetate,3-Hydroxyphenylacetyl-CoA,,3-Hydroxyphenylacetate;Coenzyme A,25,7.5,-4.885199223,19170545
acyl-CoA hydrolase,Q9NPJ3,3.1.2.20,Homo sapiens,3F5O,A,mutant N50A,H2O + 3-Hydroxyphenylacetyl-CoA = Coenzyme A + 3-Hydroxyphenylacetate,3-Hydroxyphenylacetyl-CoA,,3-Hydroxyphenylacetate;Coenzyme A,25,7.5,-7.289957354,19170545
acyl-CoA hydrolase,Q9NPJ3,3.1.2.20,Homo sapiens,3F5O,A,mutant K136A,H2O + 3-Hydroxyphenylacetyl-CoA = Coenzyme A + 3-Hydroxyphenylacetate,3-Hydroxyphenylacetyl-CoA,,Coenzyme A;3-Hydroxyphenylacetate,25,7.5,-2.549826057,19170545
acyl-CoA hydrolase,Q9NPJ3,3.1.2.20,Homo sapiens,3F5O,A,mutant H137A,H2O + 3-Hydroxyphenylacetyl-CoA = Coenzyme A + 3-Hydroxyphenylacetate,3-Hydroxyphenylacetyl-CoA,,3-Hydroxyphenylacetate;Coenzyme A,25,7.5,-3.611624739,19170545
